# Supplementary material for: Novel osmium(ii)–cymene complexes containing curcumin and bisdemethoxycurcumin ligands
Source: Royal Society of Chemistry journal article supplement (doi:10.1039/c9qi00843h), 2019-01-01
Supplement: c9qi00843h1.pdf [file c9qi00843h1.pdf]

## **Novel Osmium(II)-Cymene Complexes Containing Curcumin and Bisdemethoxycurcumin ligands**

Riccardo Pettinari,<sup>a\*</sup> Fabio Marchetti,<sup>b</sup> Corrado Di Nicola,<sup>b</sup> Claudio Pettinari,<sup>a</sup> Massimiliano Cuccioloni,<sup>c</sup> Laura Bonfili,<sup>c</sup> Anna Maria Eleuteri,<sup>c</sup> Bruno Therrien,<sup>d</sup> Lucida Kate Batchelor,<sup>e</sup> Paul J. Dyson.<sup>e\*</sup>

<sup>a</sup>School of Pharmacy, <sup>b</sup>School of Science and Technology, <sup>c</sup>School of Biosciences and Veterinary Medicine University of Camerino, via S. Agostino 1, 62032 Camerino MC, Italy, <sup>d</sup>Institute of Chemistry, University of Neuchâtel, Avenue de Bellevaux 51, CH-2000 Neuchâtel, Switzerland; <sup>e</sup>Institut des Sciences et Ingénierie Chimiques, École Polytechnique Fédérale de Lausanne (EPFL), 1015 Lausanne, Switzerland.

### **Supplementary Information**

## Table of contents

### X-Ray data

|                                                                                 |   |
|---------------------------------------------------------------------------------|---|
| Table S1. Crystallographic data and structure refinement details for <b>1</b> . | 3 |
|---------------------------------------------------------------------------------|---|

|                                                                                           |   |
|-------------------------------------------------------------------------------------------|---|
| Table S2. Selected geometrical parameters, bond distances (Å) and angles (°) for <b>1</b> | 4 |
|-------------------------------------------------------------------------------------------|---|

### Far-IR data

|                                                            |   |
|------------------------------------------------------------|---|
| Figure S1. Far-IR of [( <i>p</i> -cym)OsCl <sub>2</sub> ]. | 5 |
|------------------------------------------------------------|---|

|                                     |   |
|-------------------------------------|---|
| Figure S2. Far-IR of <b>curch</b> . | 6 |
|-------------------------------------|---|

|                                       |   |
|---------------------------------------|---|
| Figure S3. Far-IR of <b>bdcurch</b> . | 6 |
|---------------------------------------|---|

|                                 |   |
|---------------------------------|---|
| Figure S4. Far-IR of <b>1</b> . | 7 |
|---------------------------------|---|

|                                 |   |
|---------------------------------|---|
| Figure S5. Far-IR of <b>2</b> . | 7 |
|---------------------------------|---|

|                                 |   |
|---------------------------------|---|
| Figure S6. Far-IR of <b>3</b> . | 8 |
|---------------------------------|---|

|                                 |   |
|---------------------------------|---|
| Figure S7. Far-IR of <b>4</b> . | 8 |
|---------------------------------|---|

### Relevant NMR spectra

|                                        |   |
|----------------------------------------|---|
| Figure S8-S25. NMR spectra of <b>1</b> | 9 |
|----------------------------------------|---|

|                                         |    |
|-----------------------------------------|----|
| Figure S26-S28. NMR spectra of <b>2</b> | 20 |
|-----------------------------------------|----|

|                                         |    |
|-----------------------------------------|----|
| Figure S29-S34. NMR spectra of <b>3</b> | 22 |
|-----------------------------------------|----|

|                                         |    |
|-----------------------------------------|----|
| Figure S35-S49. NMR spectra of <b>4</b> | 25 |
|-----------------------------------------|----|

### Biological studies

|                             |    |
|-----------------------------|----|
| Figure S50-S53. DNA binding | 33 |
|-----------------------------|----|

|                             |    |
|-----------------------------|----|
| Figure S54-S55. BSA binding | 37 |
|-----------------------------|----|

|                                                                     |    |
|---------------------------------------------------------------------|----|
| Figure S56. 3-hydroxy-3-methylglutaryl-coenzyme A reductase binding | 39 |
|---------------------------------------------------------------------|----|

**Table S1** – Crystallographic data and structure refinement details for compound **1**.

|                                                      | <b>1</b>                                            |
|------------------------------------------------------|-----------------------------------------------------|
| Chemical formula                                     | C <sub>31</sub> H <sub>33</sub> ClO <sub>6</sub> Os |
| Formula weight                                       | 727.22                                              |
| Crystal system                                       | Orthorhombic                                        |
| Space group                                          | <i>Pbca</i> (no. 61)                                |
| Crystal color and shape                              | Orange block                                        |
| Crystal size                                         | 0.22 x 0.19 x 0.18                                  |
| <i>a</i> (Å)                                         | 7.9750(3)                                           |
| <i>b</i> (Å)                                         | 22.7119(11)                                         |
| <i>c</i> (Å)                                         | 32.7398(14)                                         |
| <i>V</i> (Å <sup>3</sup> )                           | 5930.1(4)                                           |
| <i>Z</i>                                             | 8                                                   |
| <i>T</i> (K)                                         | 293(2)                                              |
| <i>D</i> <sub>c</sub> (g·cm <sup>-3</sup> )          | 1.629                                               |
| μ (mm <sup>-1</sup> )                                | 4.432                                               |
| Scan range (°)                                       | 1.79 < θ < 29.28                                    |
| Unique reflections                                   | 7961                                                |
| Observed refls [ <i>I</i> > 2σ( <i>I</i> )]          | 4001                                                |
| <i>R</i> <sub>int</sub>                              | 0.1065                                              |
| Final <i>R</i> indices [ <i>I</i> > 2σ( <i>I</i> )]* | 0.0937, <i>wR</i> <sub>2</sub> 0.2150               |
| <i>R</i> indices (all data)                          | 0.1779, <i>wR</i> <sub>2</sub> 0.2565               |
| Goodness-of-fit                                      | 1.029                                               |
| Max, Min Δρ/e (Å <sup>-3</sup> )                     | 4.927, - 2.094                                      |

**Table S2** – Selected bond distances (Å) and angles (°) for compound **1**.

Distances (Å)

|             |           |
|-------------|-----------|
| Os-O1       | 2.092(9)  |
| Os-O2       | 2.088(9)  |
| Os-Cl       | 2.430(4)  |
| C9-O1       | 1.293(16) |
| C11-O2      | 1.257(16) |
| C9-C10      | 1.359(19) |
| C10-C11     | 1.392(18) |
| Os-centroid | 1.65      |

Angles (°)

|          |         |
|----------|---------|
| O1-Os-O2 | 87.0(4) |
| O1-Os-Cl | 84.6(3) |
| O2-Os-Cl | 85.7(3) |



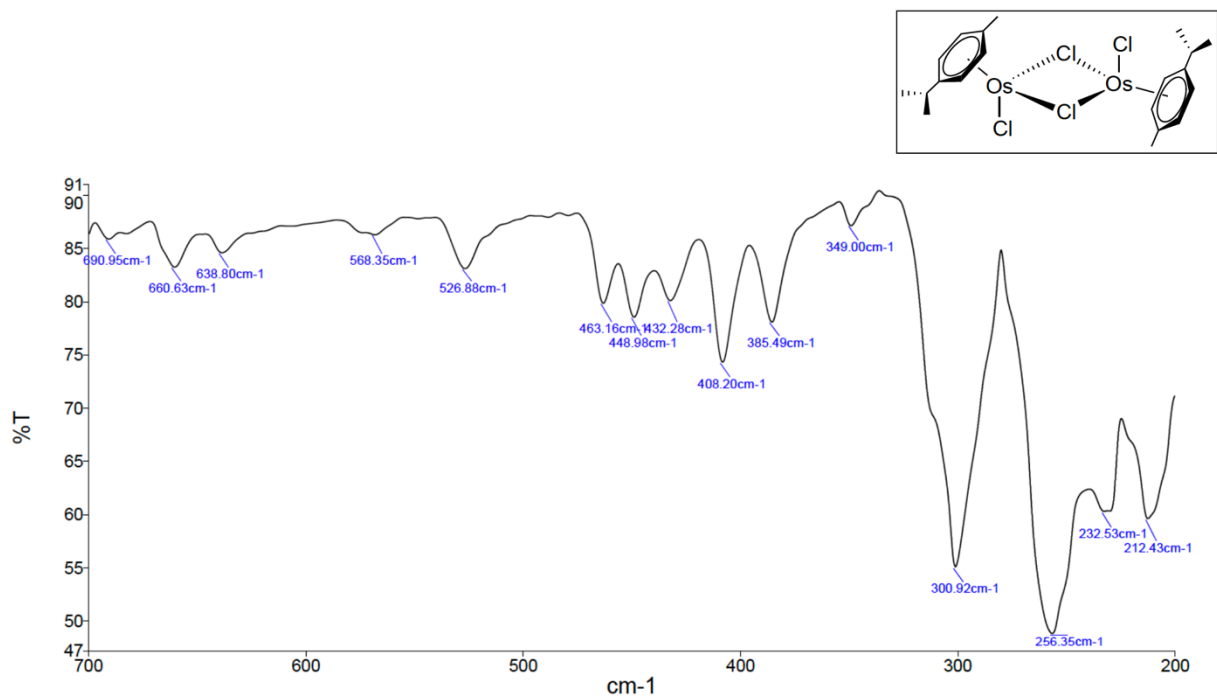

**Figure S1.** Far-IR of  $[(p\text{-cym})\text{OsCl}_2]$ .

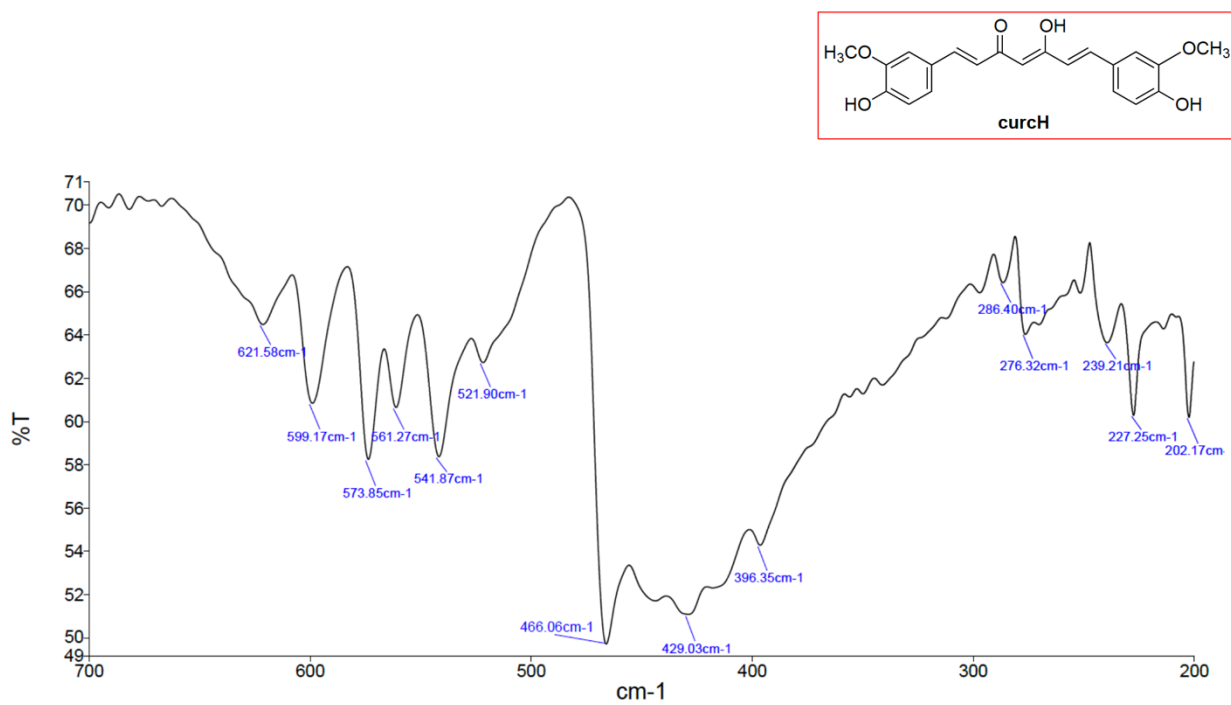

**Figure S2.** Far-IR of **curcH**.

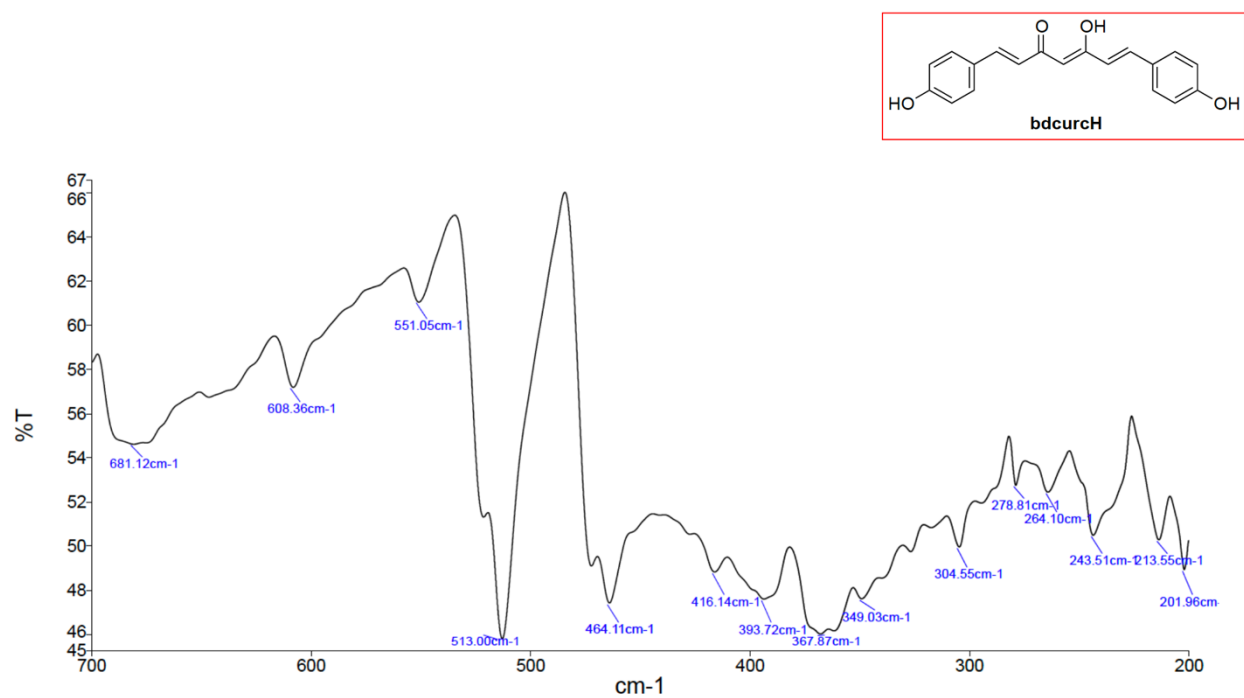

**Figure S3.** Far-IR of **bdcurcH**.

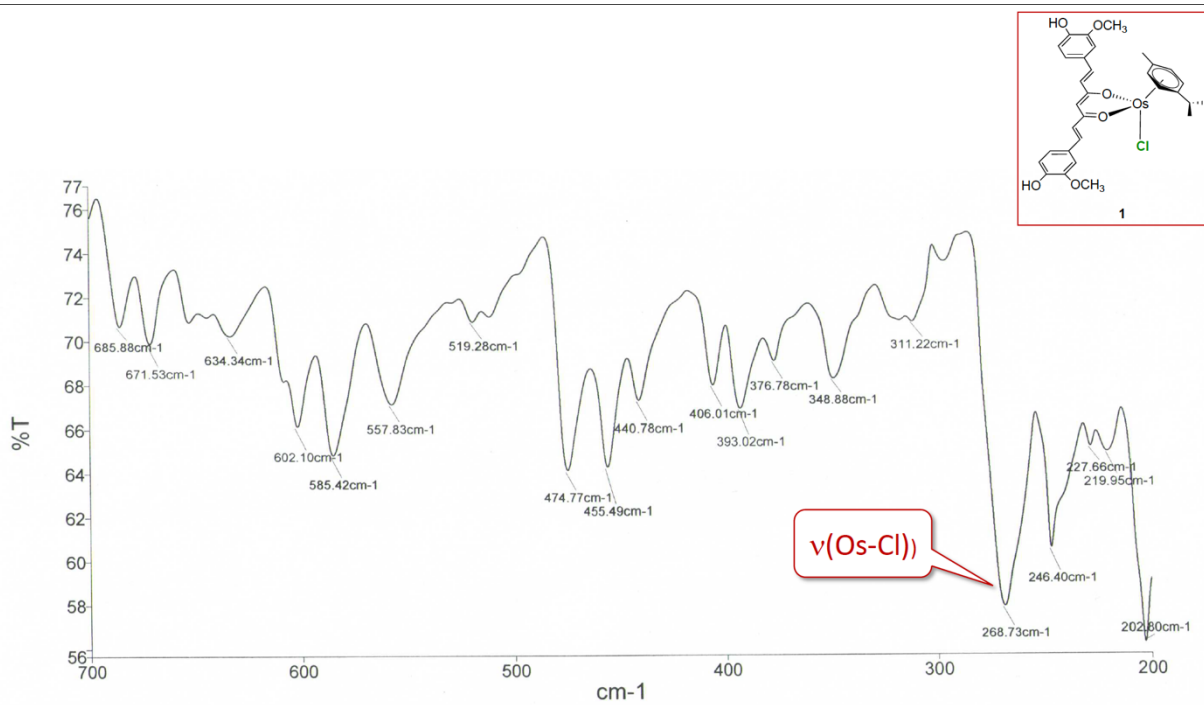

**Figure S4.** Far-IR of **1**.

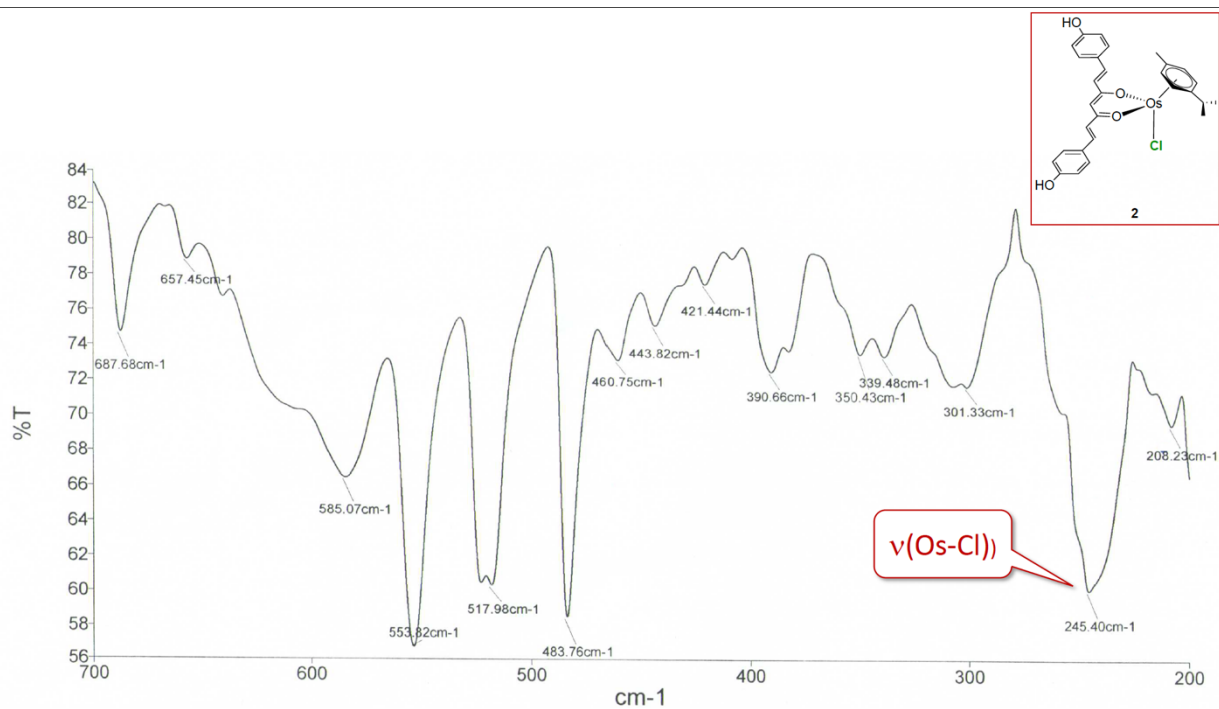

**Figure S5.** Far-IR of **2**.

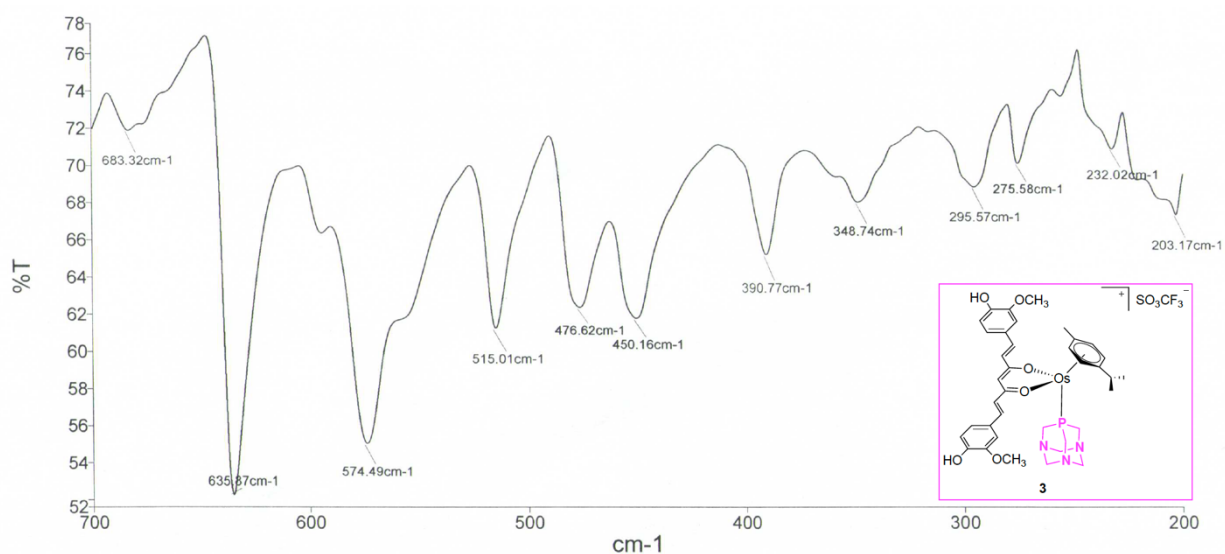

**Figure S6.** Far-IR of **3**.

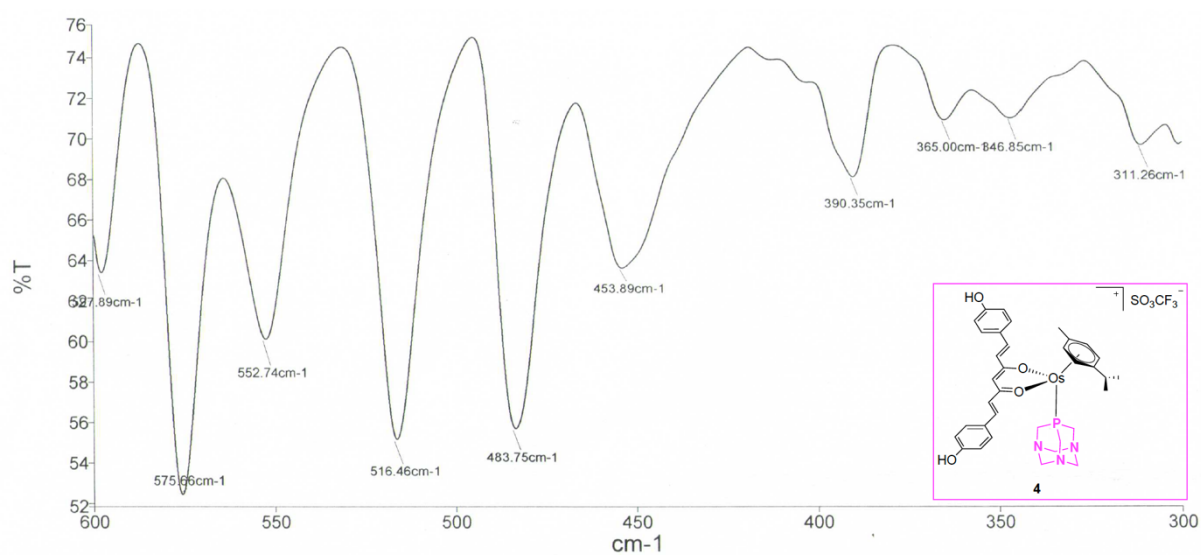

**Figure S7.** Far-IR of **4**.

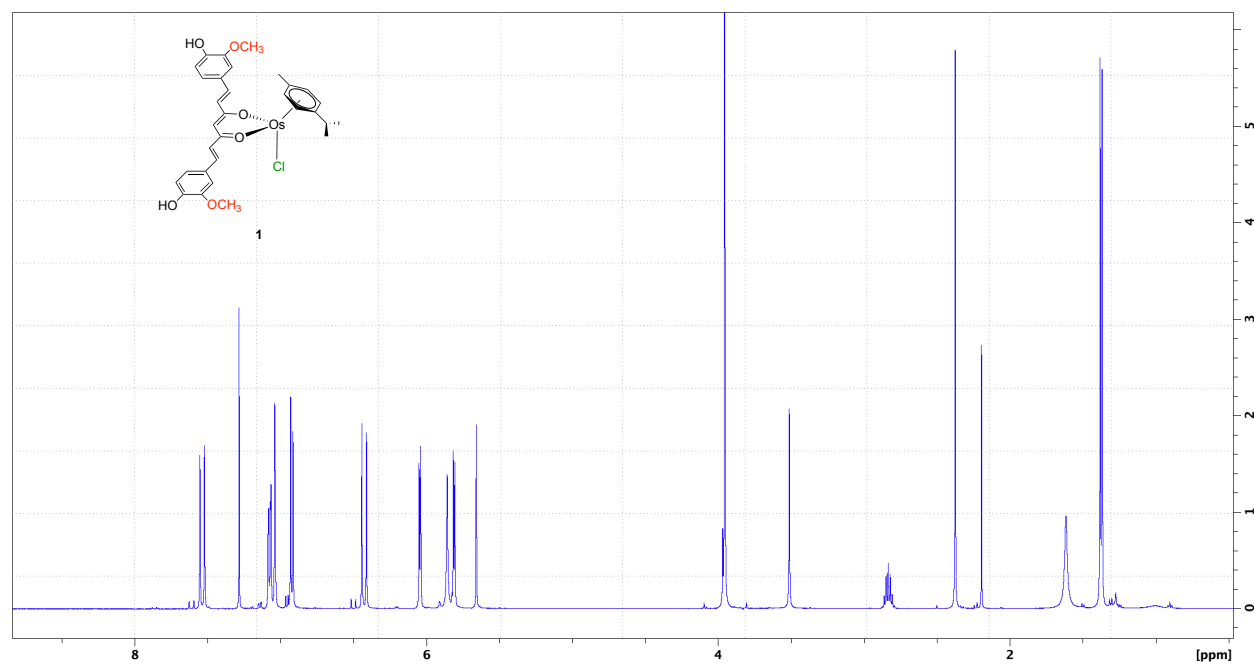

**Figure S8.**  $^1\text{H}$  NMR spectrum in  $\text{CDCl}_3$  at 298 K of **1**.

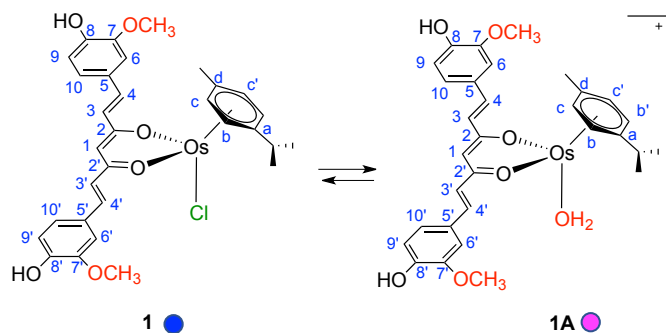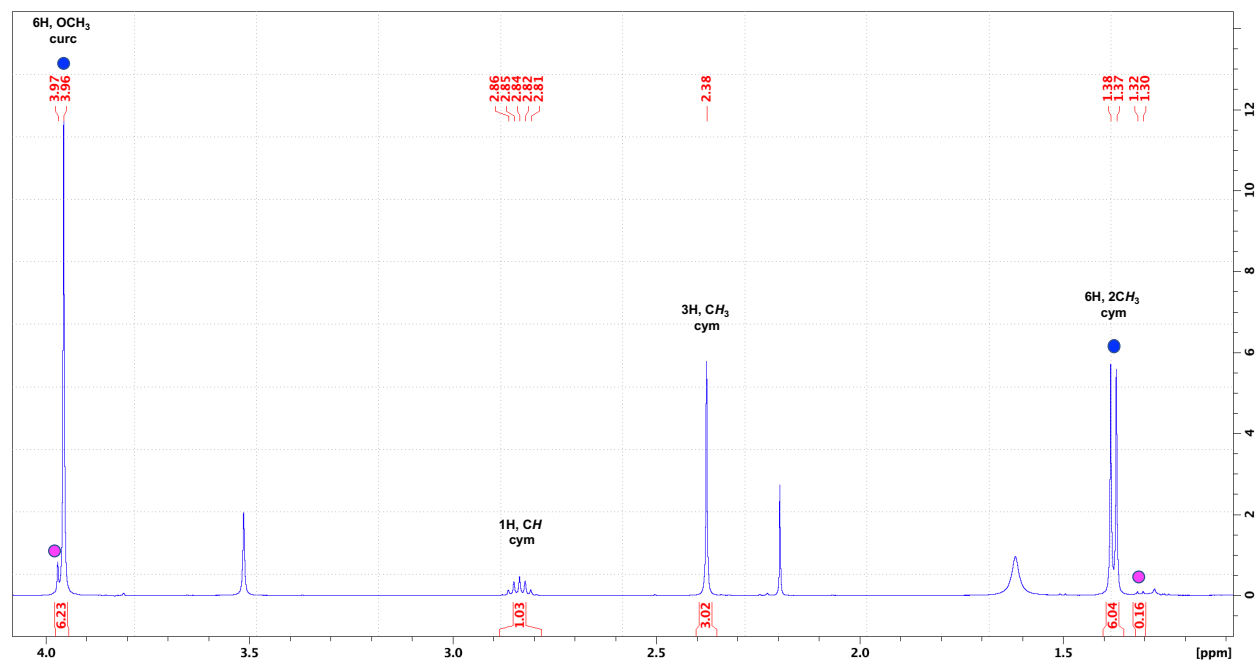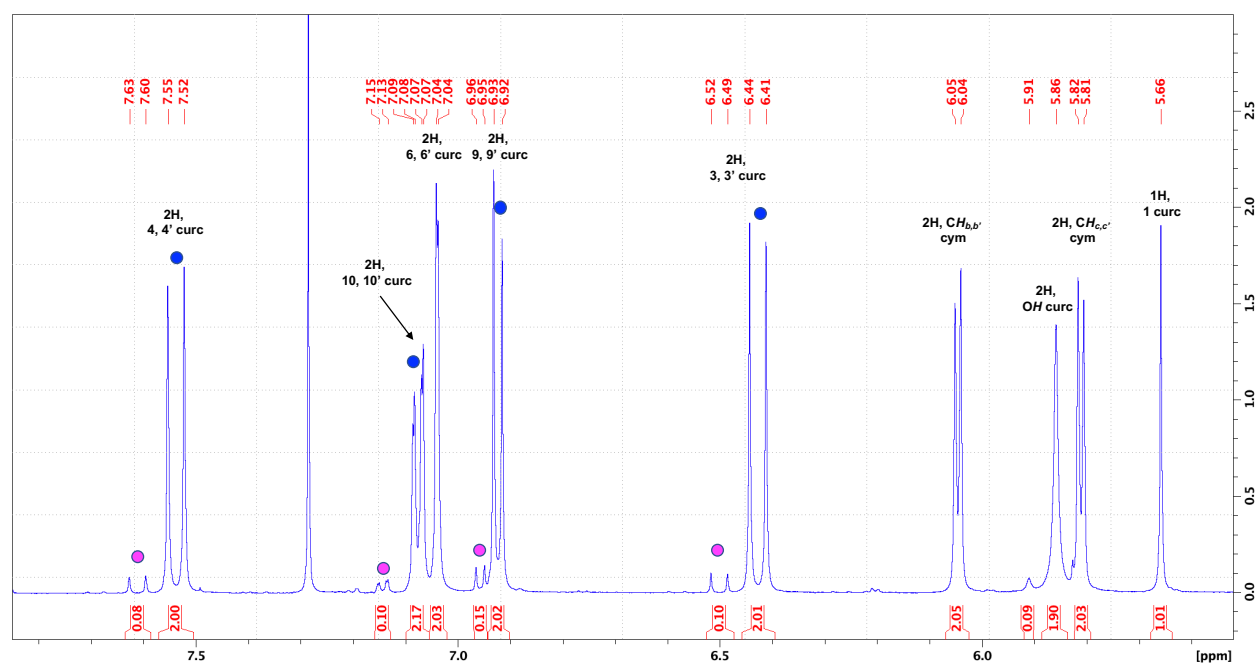

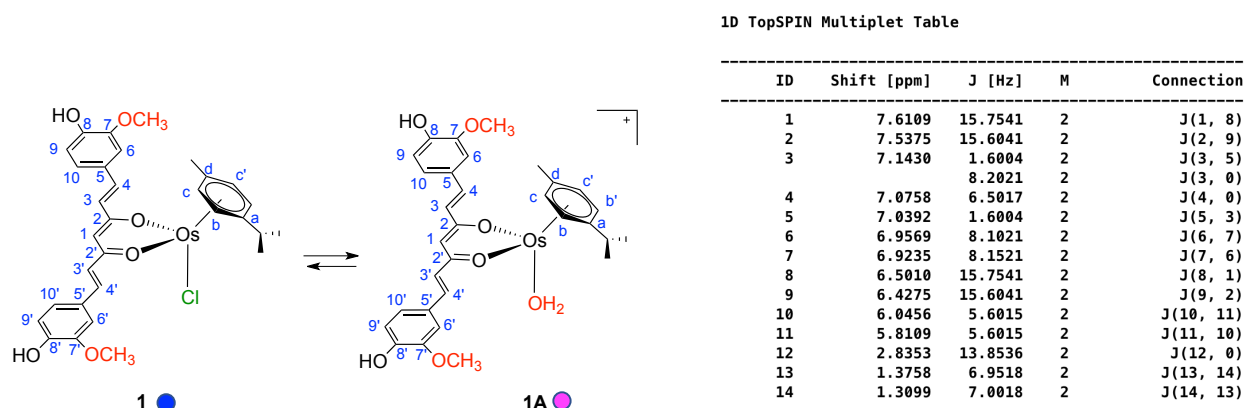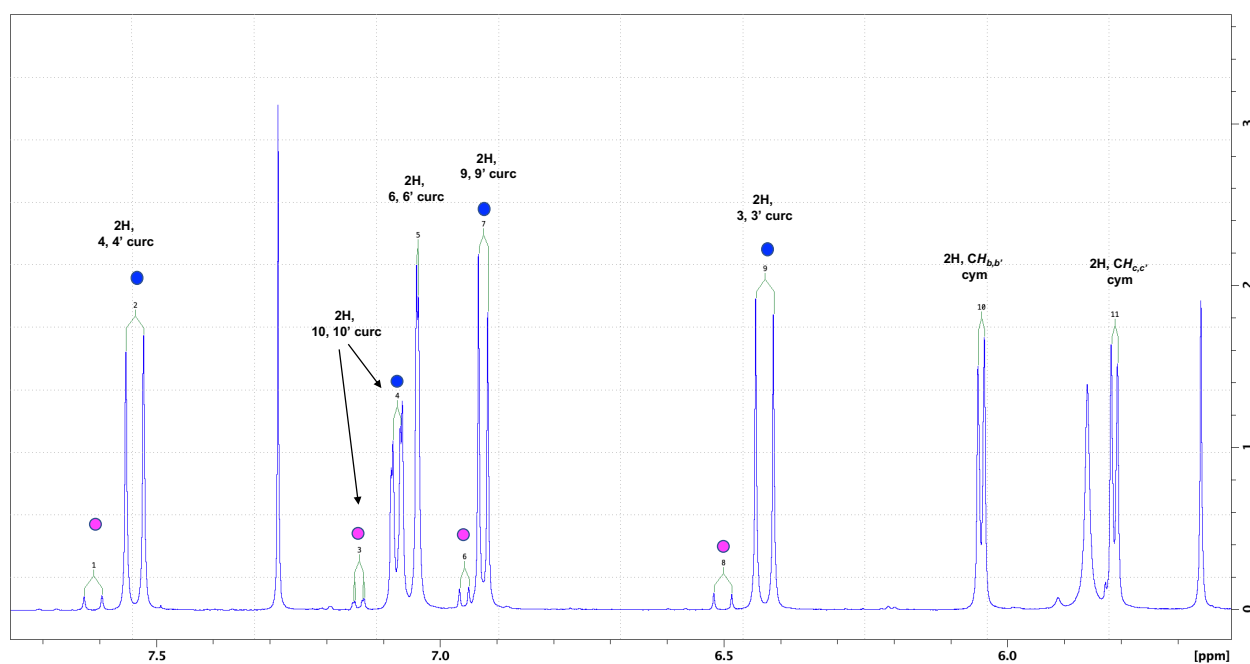

**Figure S11.** Magnification of  $^1\text{H}$  NMR spectrum in  $\text{CDCl}_3$  at 298 K of **1**.

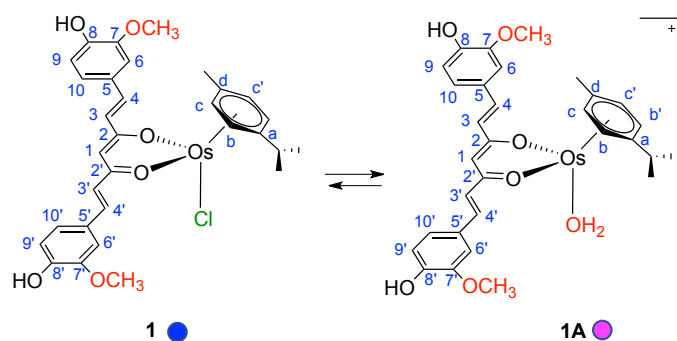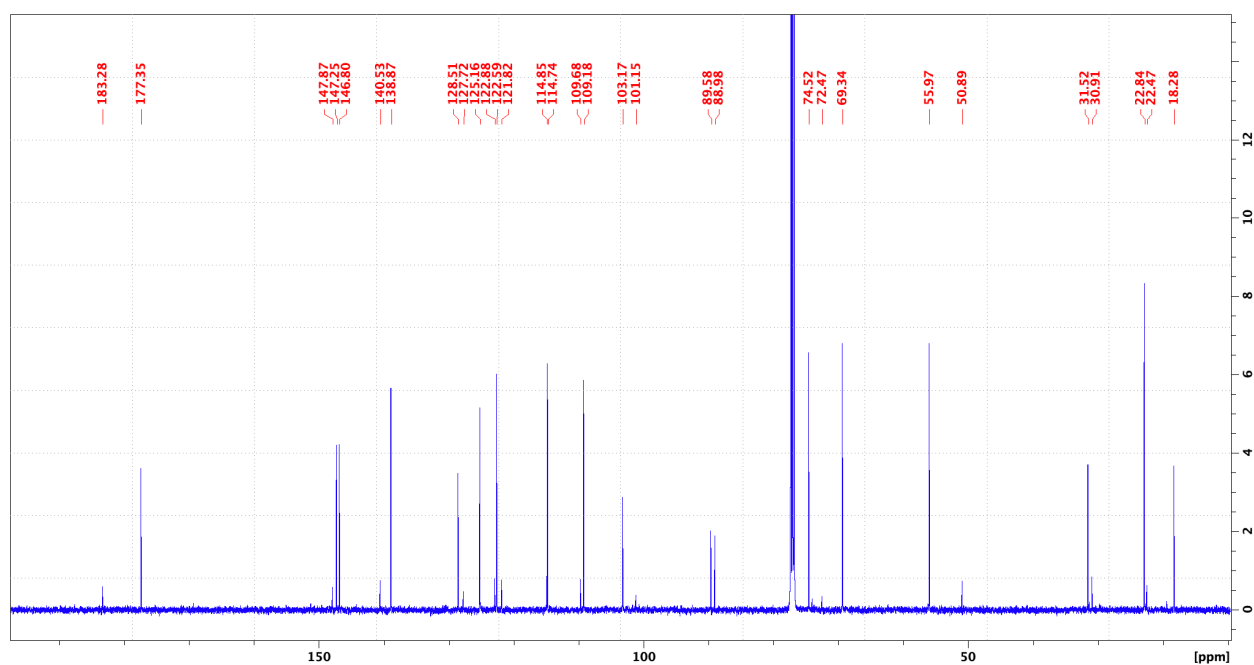

**Figure S12.**  $^{13}\text{C}$  NMR spectrum in  $\text{CDCl}_3$  at 298 K of **1**.

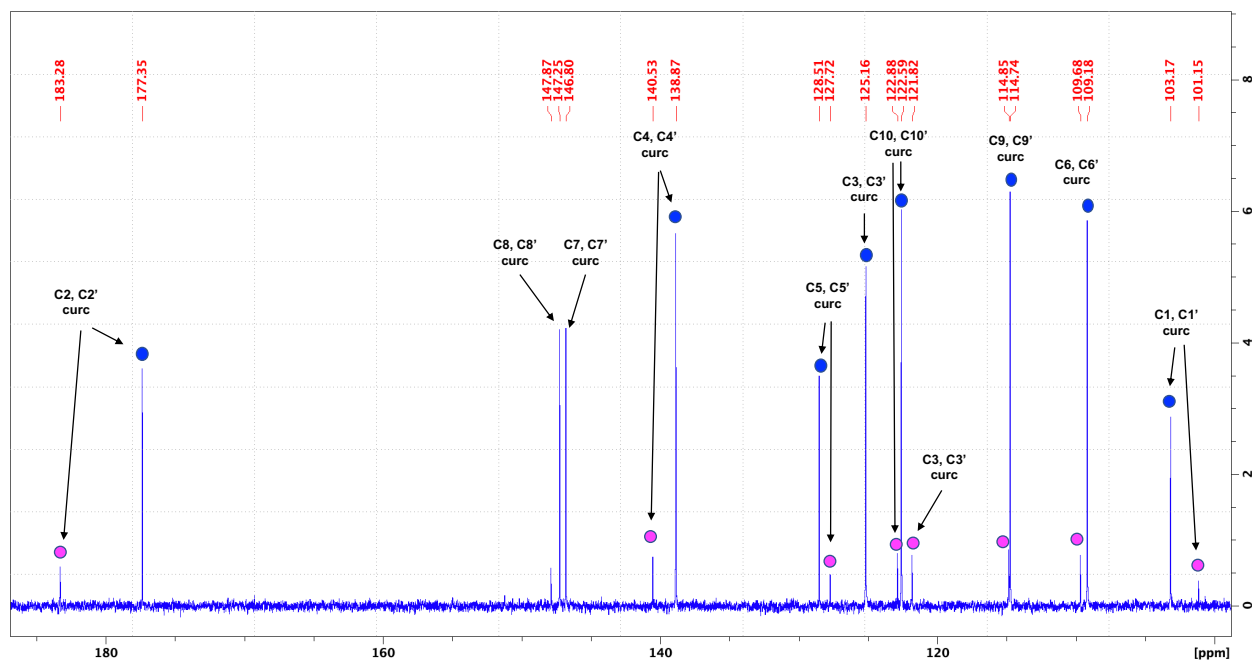

**Figure S13.** Magnification of  $^{13}\text{C}$  NMR spectrum in  $\text{CDCl}_3$  at 298 K of **1**.



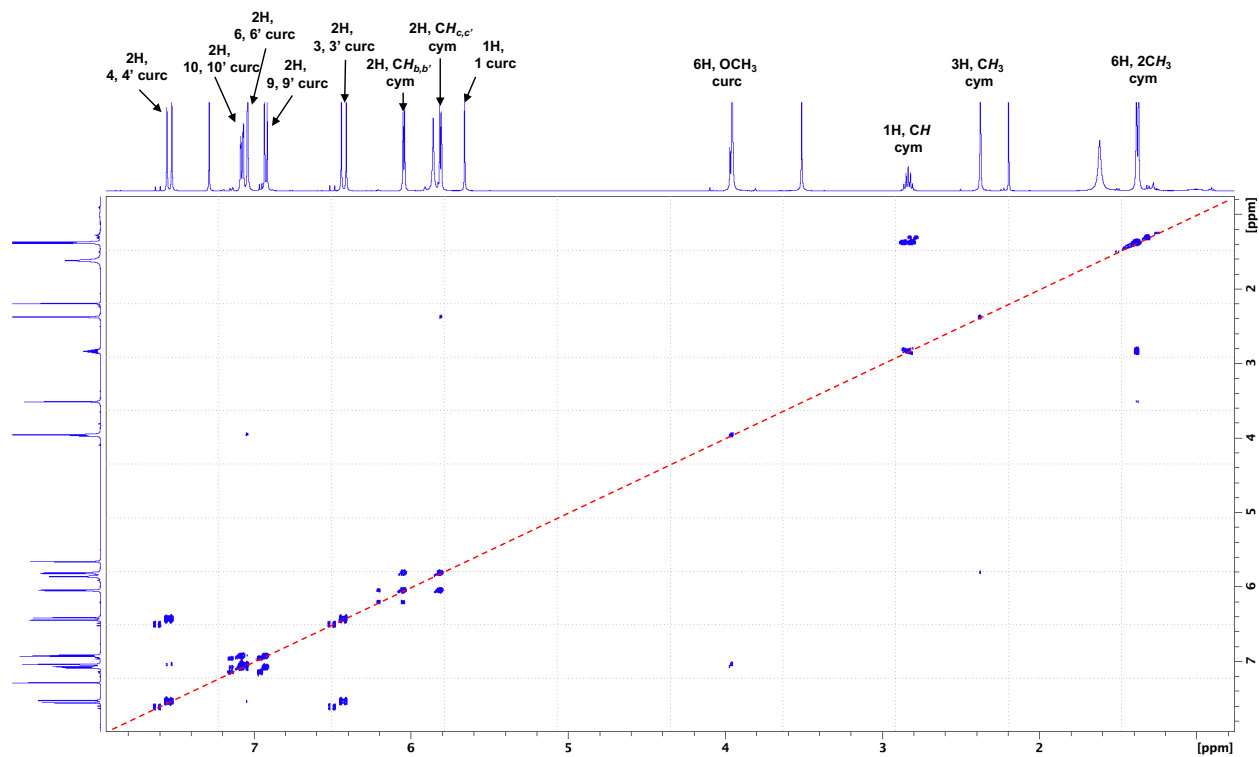

**Figure S14.**  $\{^1\text{H}, ^1\text{H}\}$ -COSY spectrum in  $\text{CDCl}_3$  at 298 K of **1**.

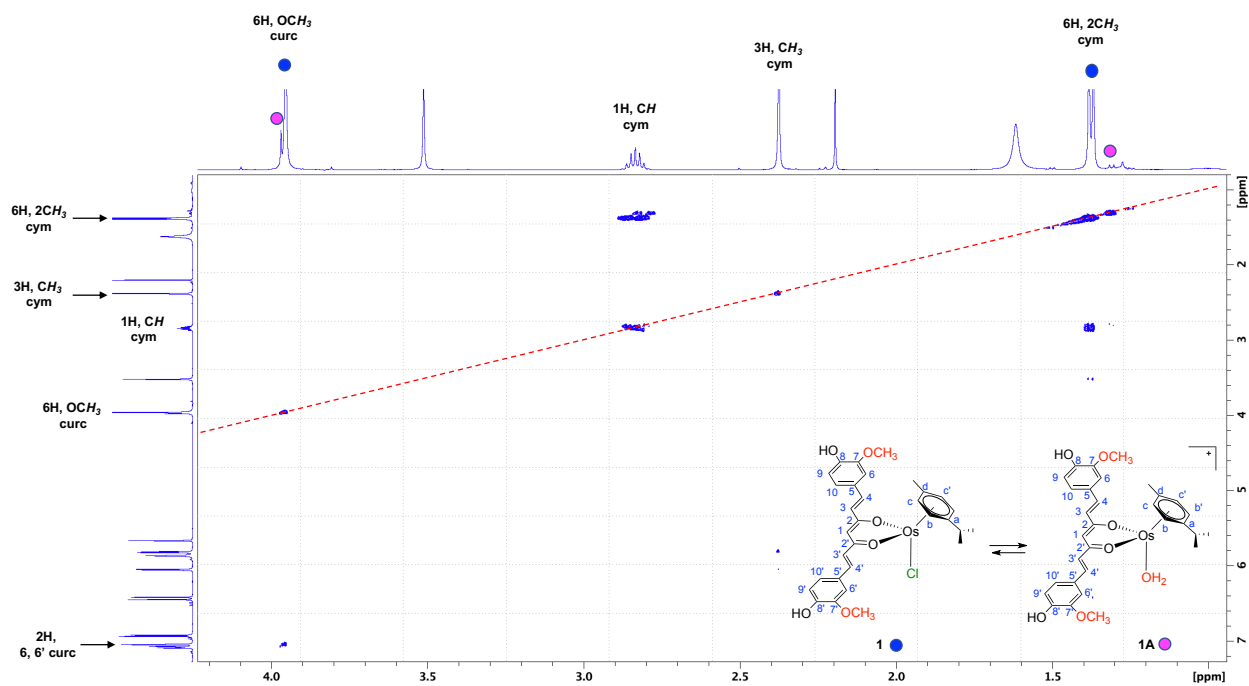

**Figure S15.** Magnification of  $\{^1\text{H}, ^1\text{H}\}$ -COSY spectrum in  $\text{CDCl}_3$  at 298 K of **1**.

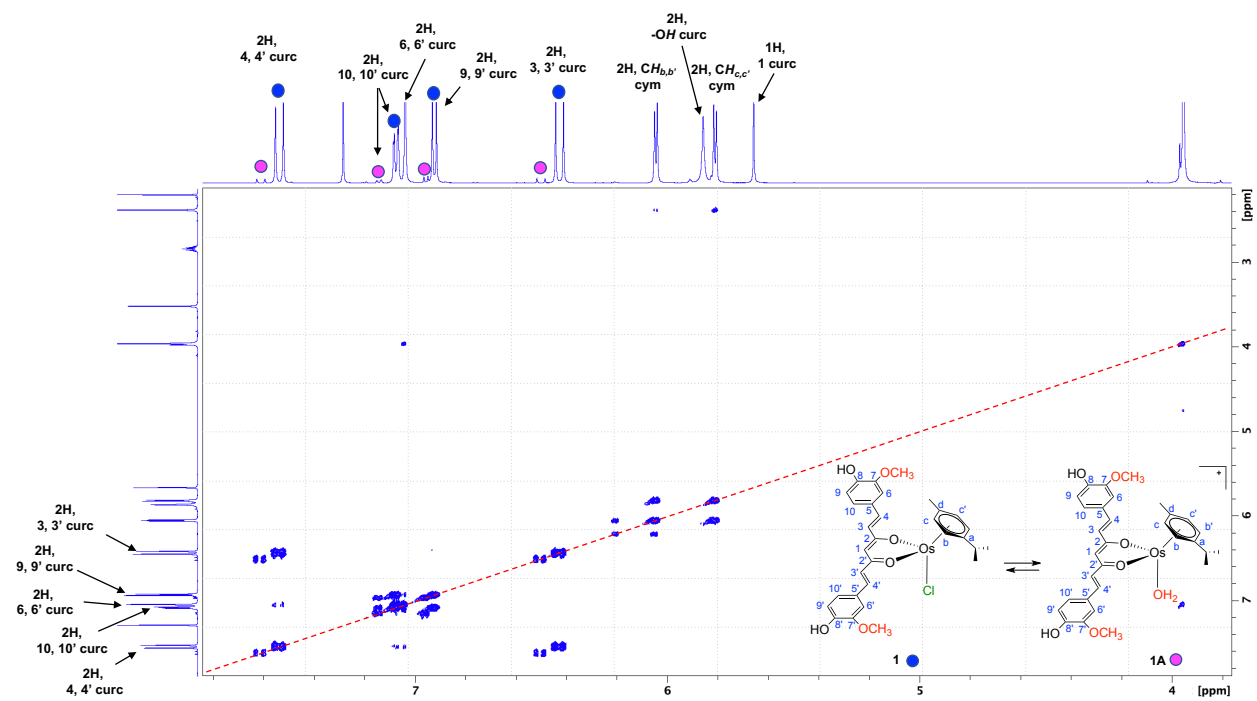

**Figure S16.** Magnification of  $\{^1\text{H}, ^1\text{H}\}$ -COSY spectrum in  $\text{CDCl}_3$  at 298 K of **1**.

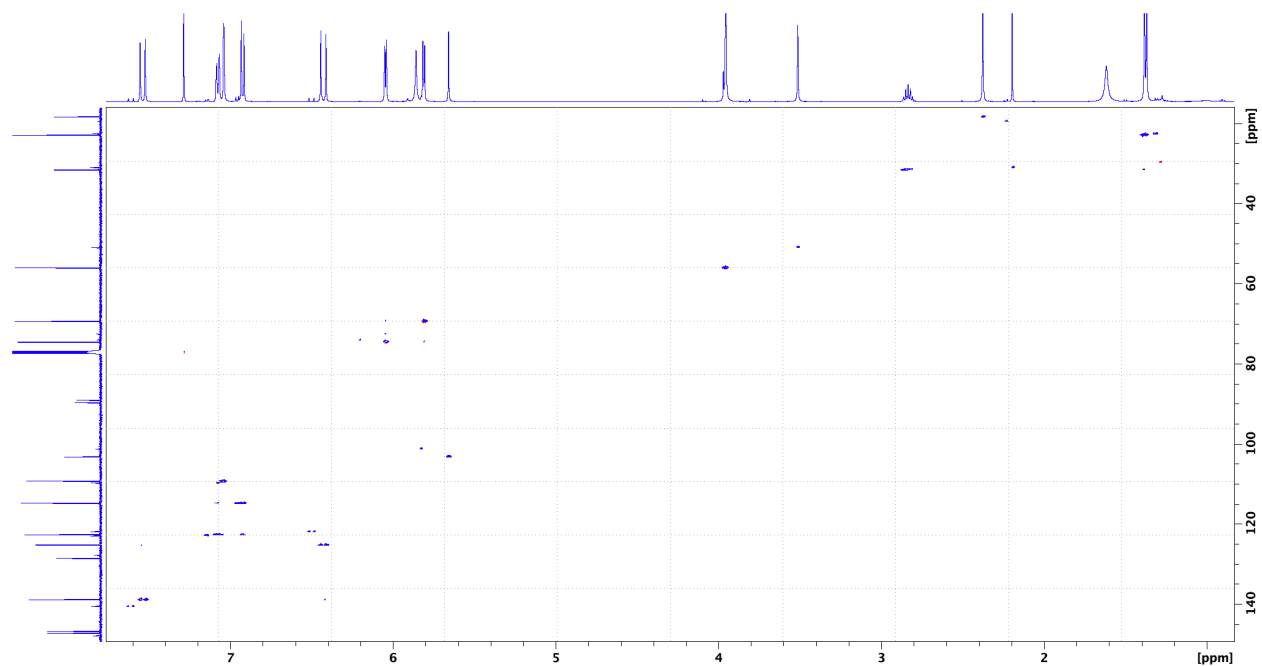

**Figure S17.**  $\{^1\text{H}, ^{13}\text{C}\}$ -HSQC spectrum in  $\text{CDCl}_3$  at 298 K of **1**.

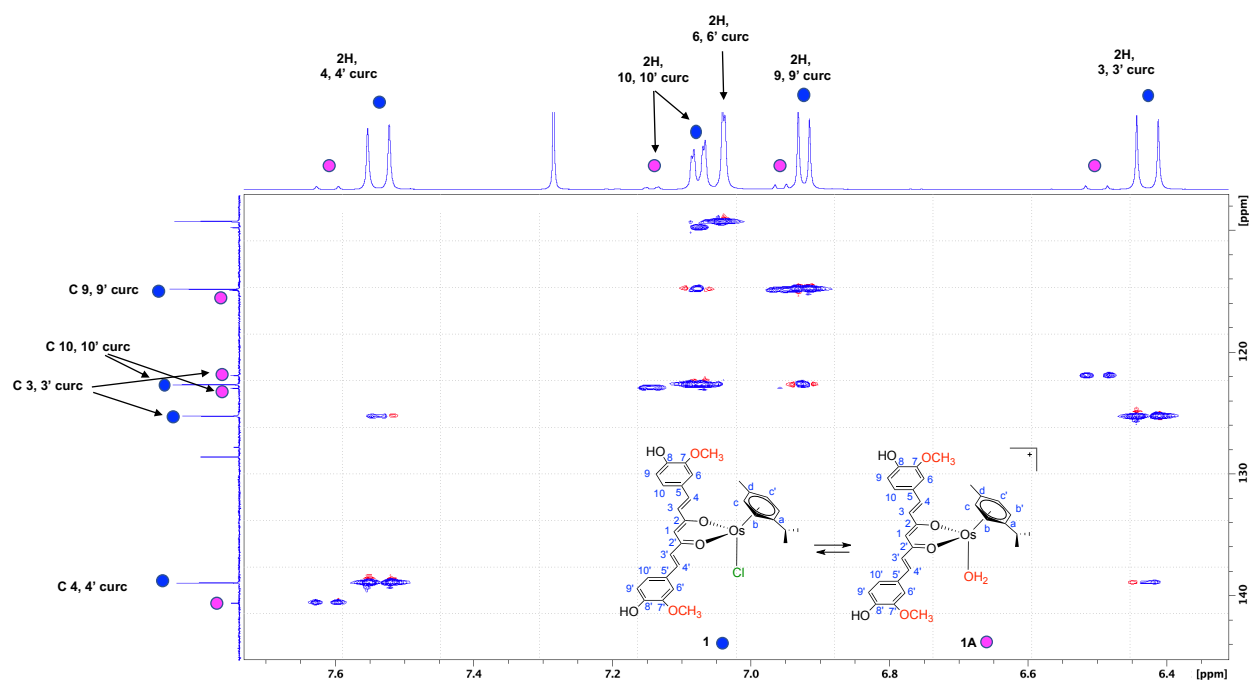

**Figure S18.** Magnification of  $\{^1\text{H}, ^{13}\text{C}\}$ -HSQC spectrum in  $\text{CDCl}_3$  at 298 K of **1**.

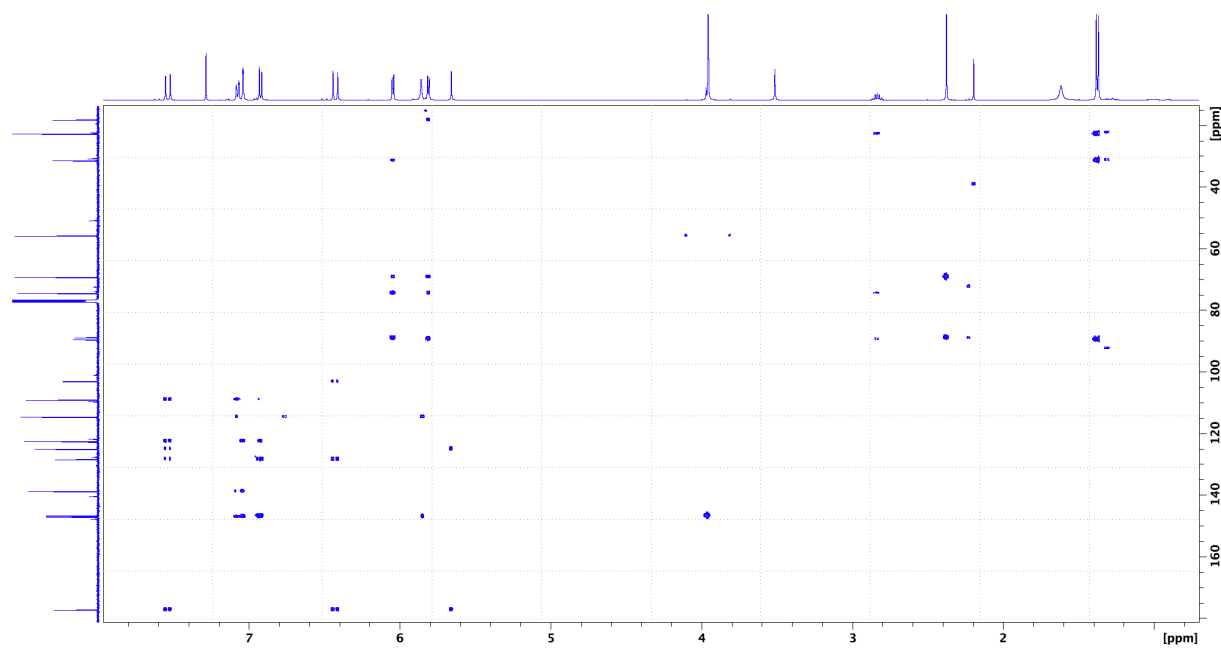

**Figure S19.**  $\{^1\text{H}, ^{13}\text{C}\}$ -HMBC spectrum in  $\text{CDCl}_3$  at 298 K of **1**.

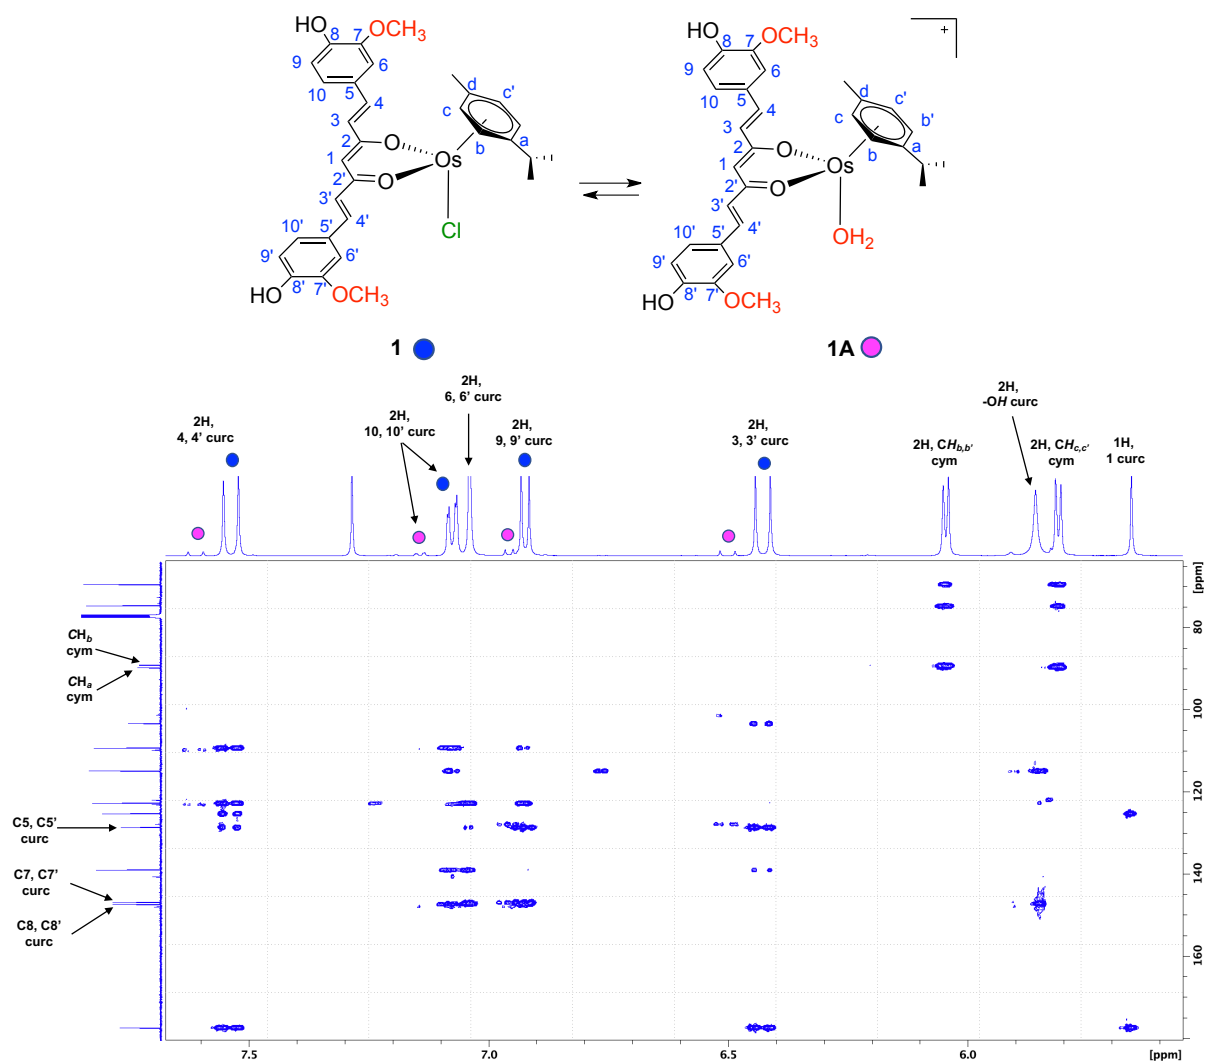

**Figure S20.** Magnification of  $\{^1\text{H}, ^{13}\text{C}\}$ -HMBC spectrum in  $\text{CDCl}_3$  at 298 K of **1**.

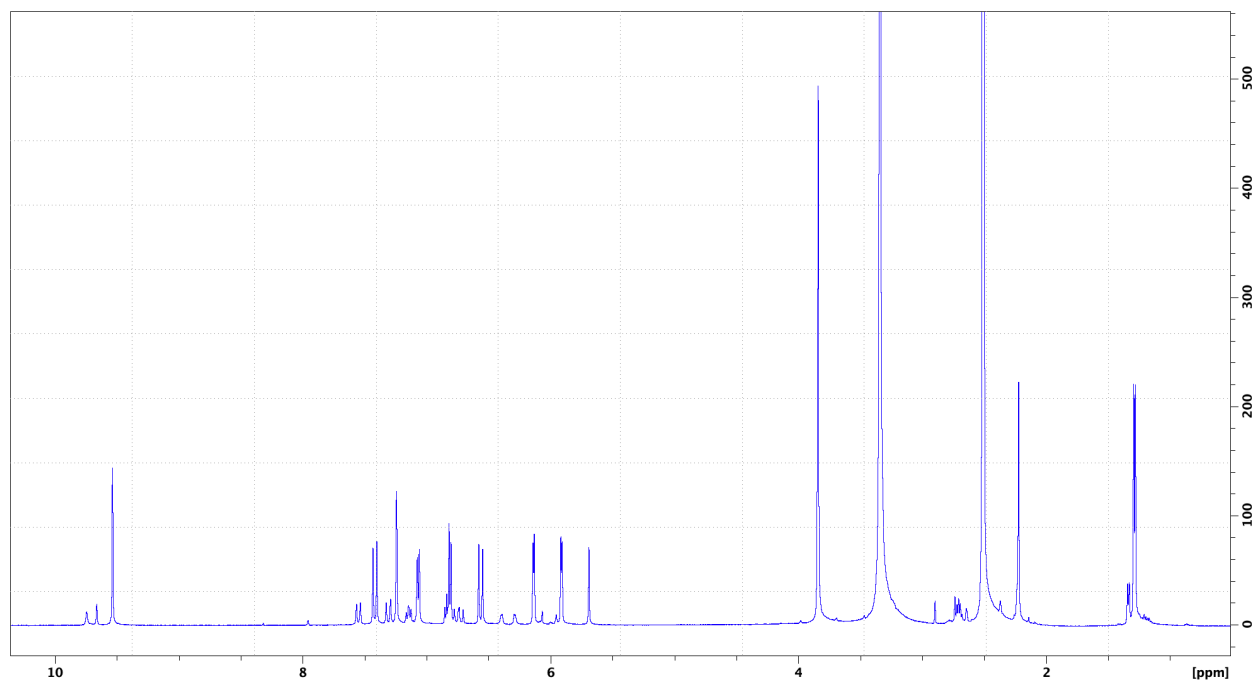

**Figure S21.**  $^1\text{H}$  NMR spectrum in  $[\text{D}_6]\text{DMSO}$  at 298 K of **1**.

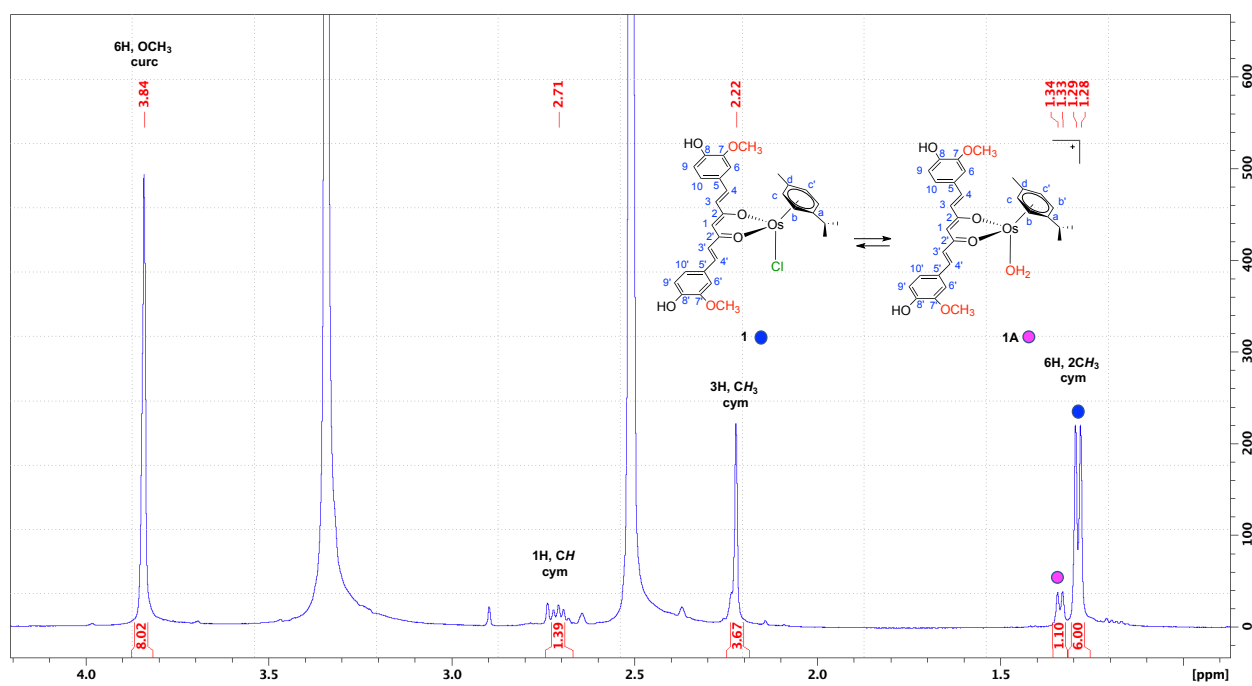

**Figure S22.** Magnification of  $^1\text{H}$  NMR spectrum in  $[\text{D}_6]\text{DMSO}$  at 298 K of **1**.

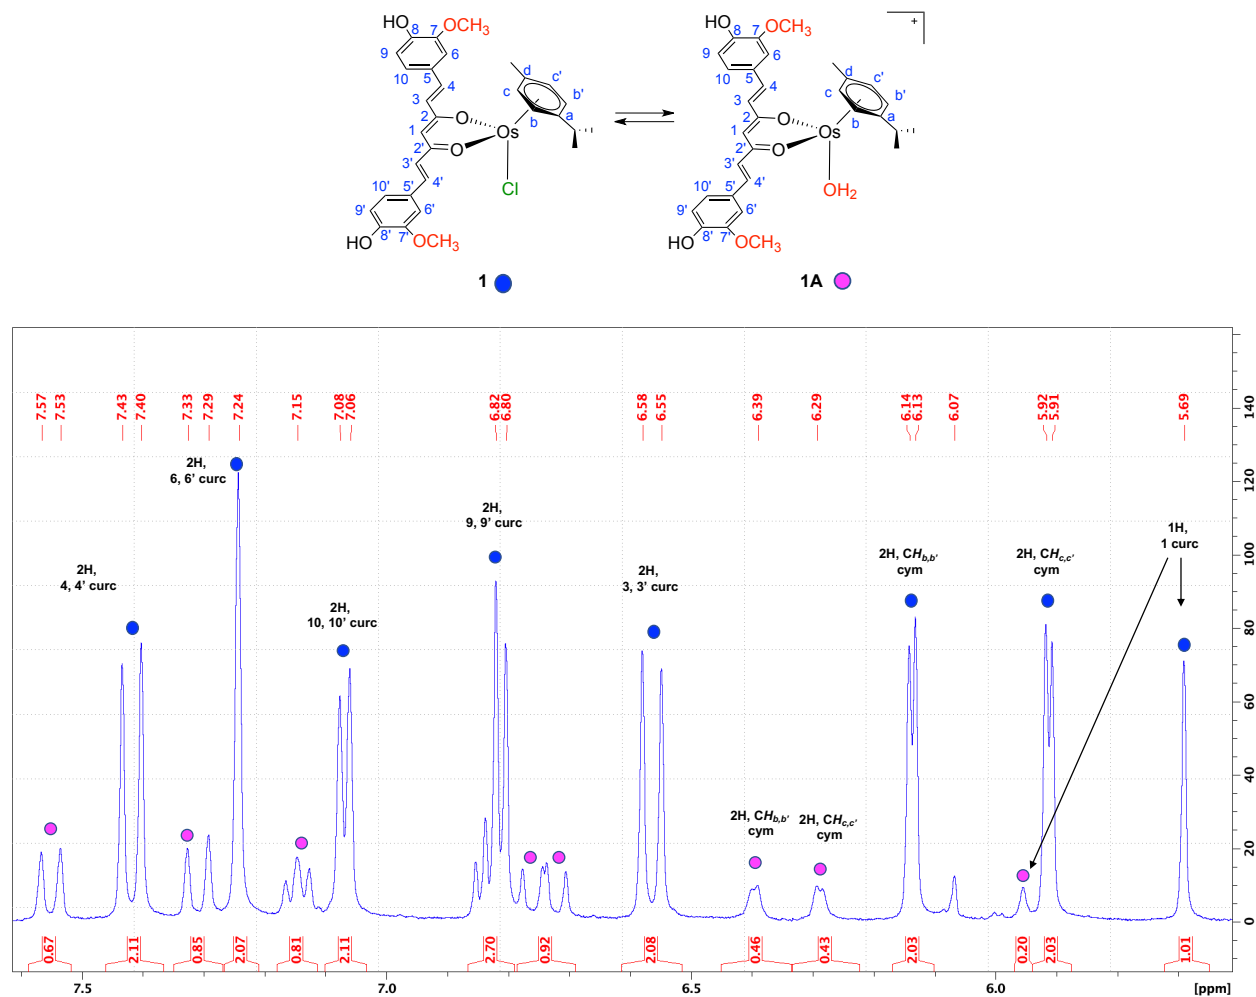

**Figure S23.** Magnification of <sup>1</sup>H NMR spectrum in [D<sub>6</sub>]DMSO at 298 K of **1**.

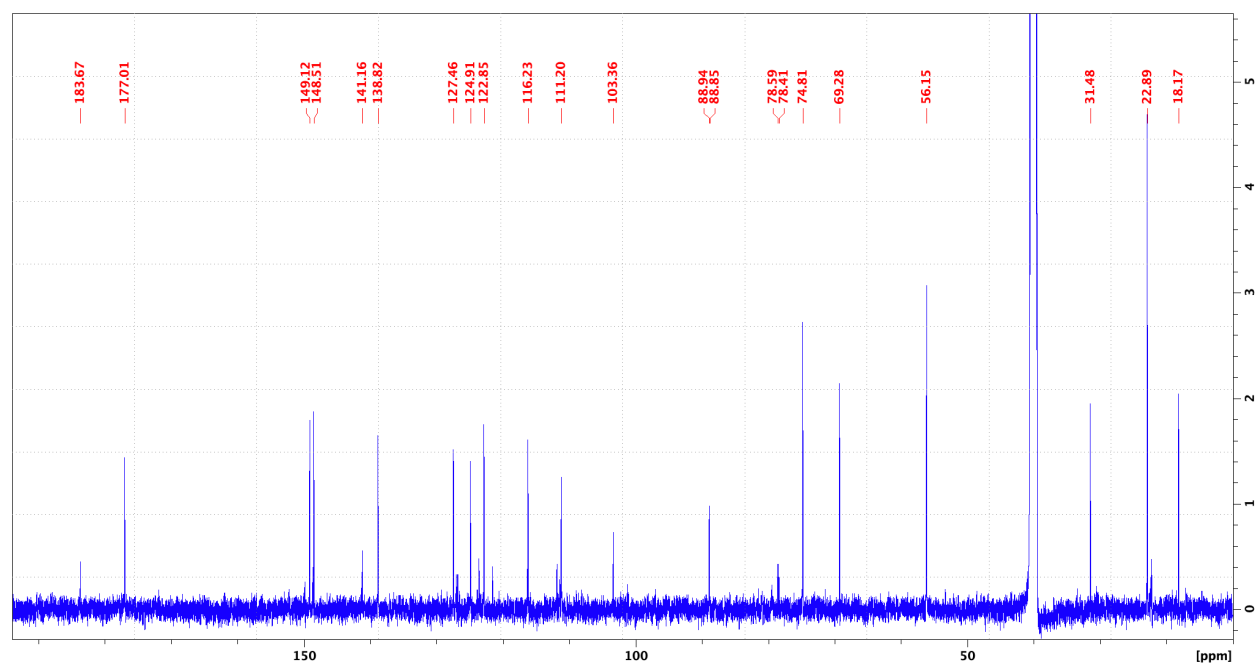

**Figure S24.** <sup>13</sup>C NMR spectrum in [D<sub>6</sub>]DMSO at 298 K of **1**.

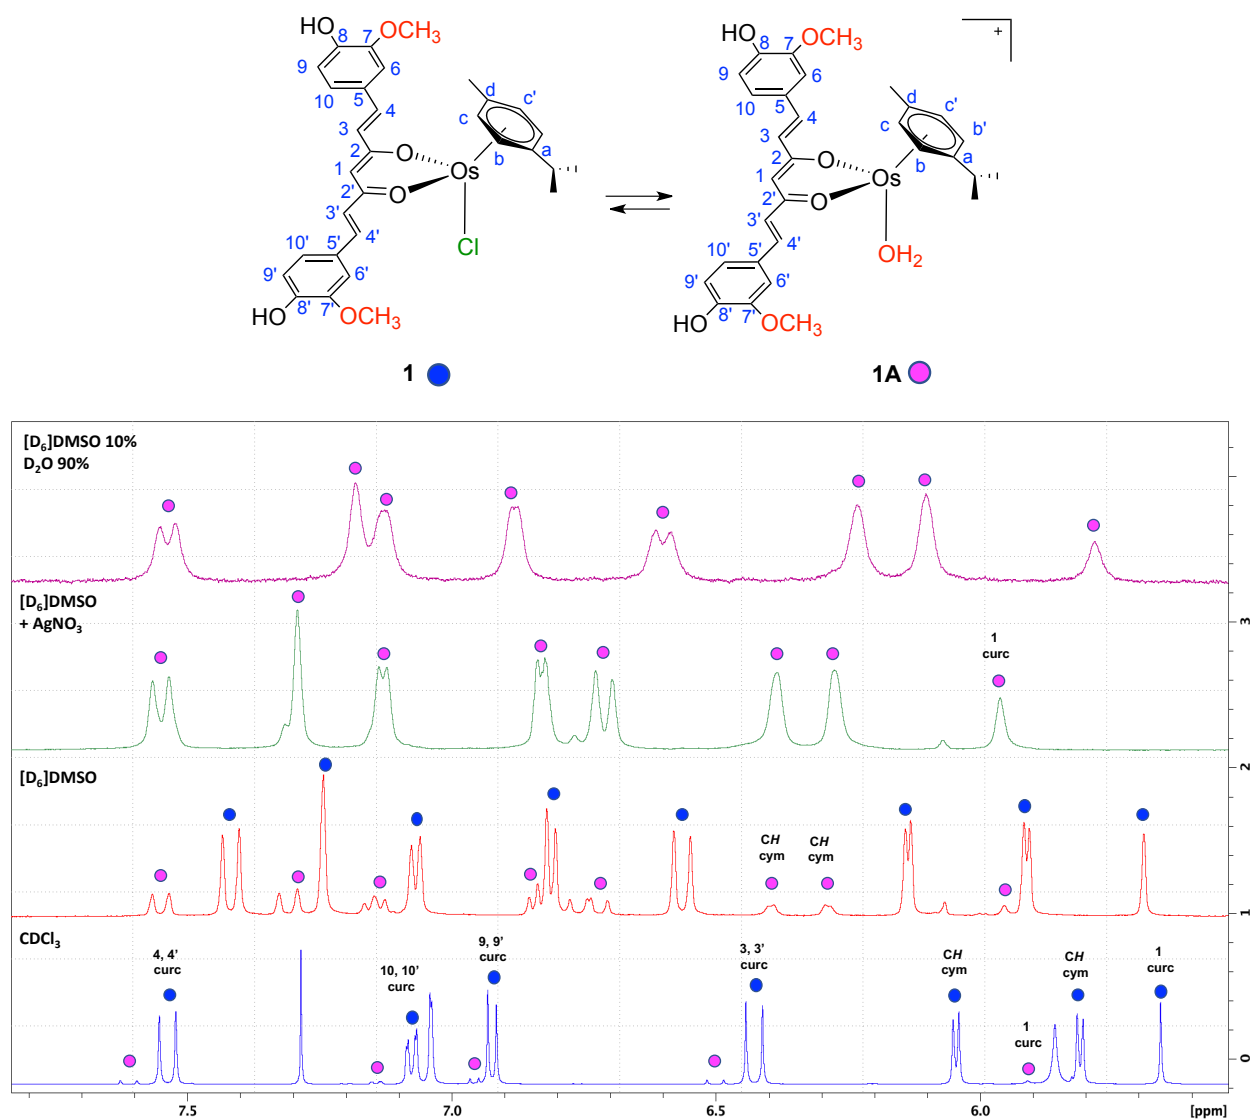

**Figure S25.** Low field region of the <sup>1</sup>H NMR spectra of **1**, [(p-cym)Os(curc)(Cl)]: (A) a solution of **1** in CD<sub>3</sub>Cl at 298 K, (B) a solution of **1**, in DMSO [d<sub>6</sub>] at 298 K and (C) after treatment of (B) with 1 mol equiv AgNO<sub>3</sub> for 1 h to remove the Cl ligand and generate **1A**, [(p-cym)Os(curc)(OH<sub>2</sub>)]<sup>+</sup> and (D) a solution of **1**, in 10% [D<sub>6</sub>]DMSO-90% D<sub>2</sub>O at 298 K.

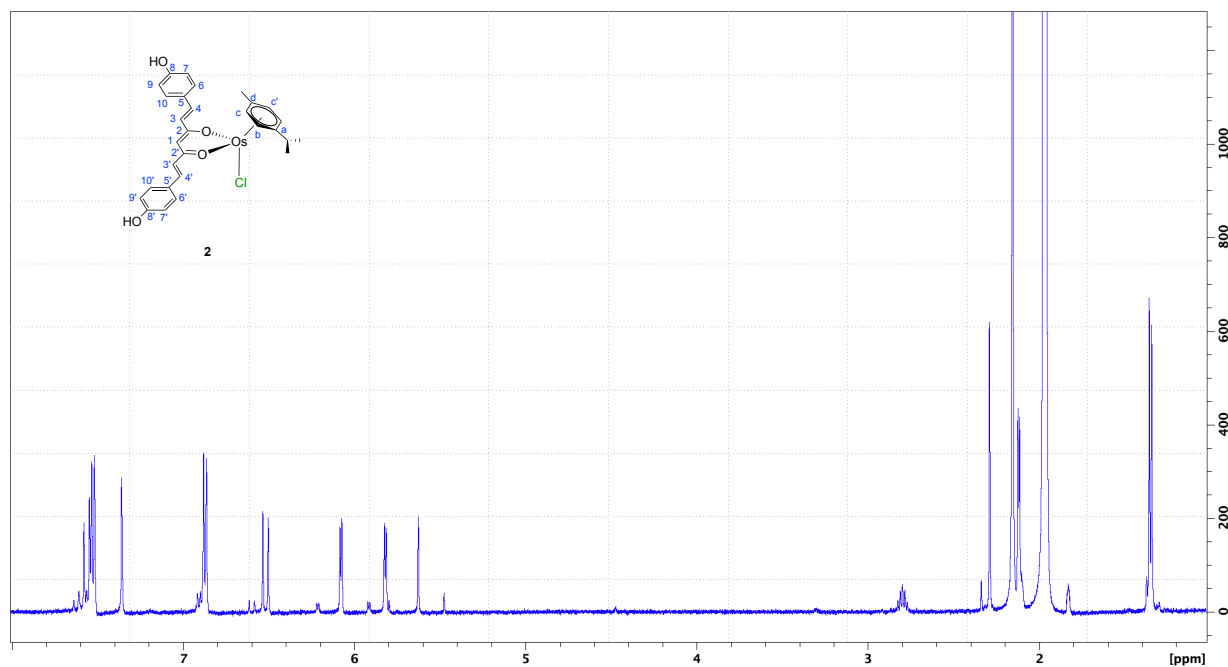

**Figure S26.**  $^1\text{H}$  NMR spectrum in  $\text{CD}_3\text{CN}$  at 298 K of **2**.

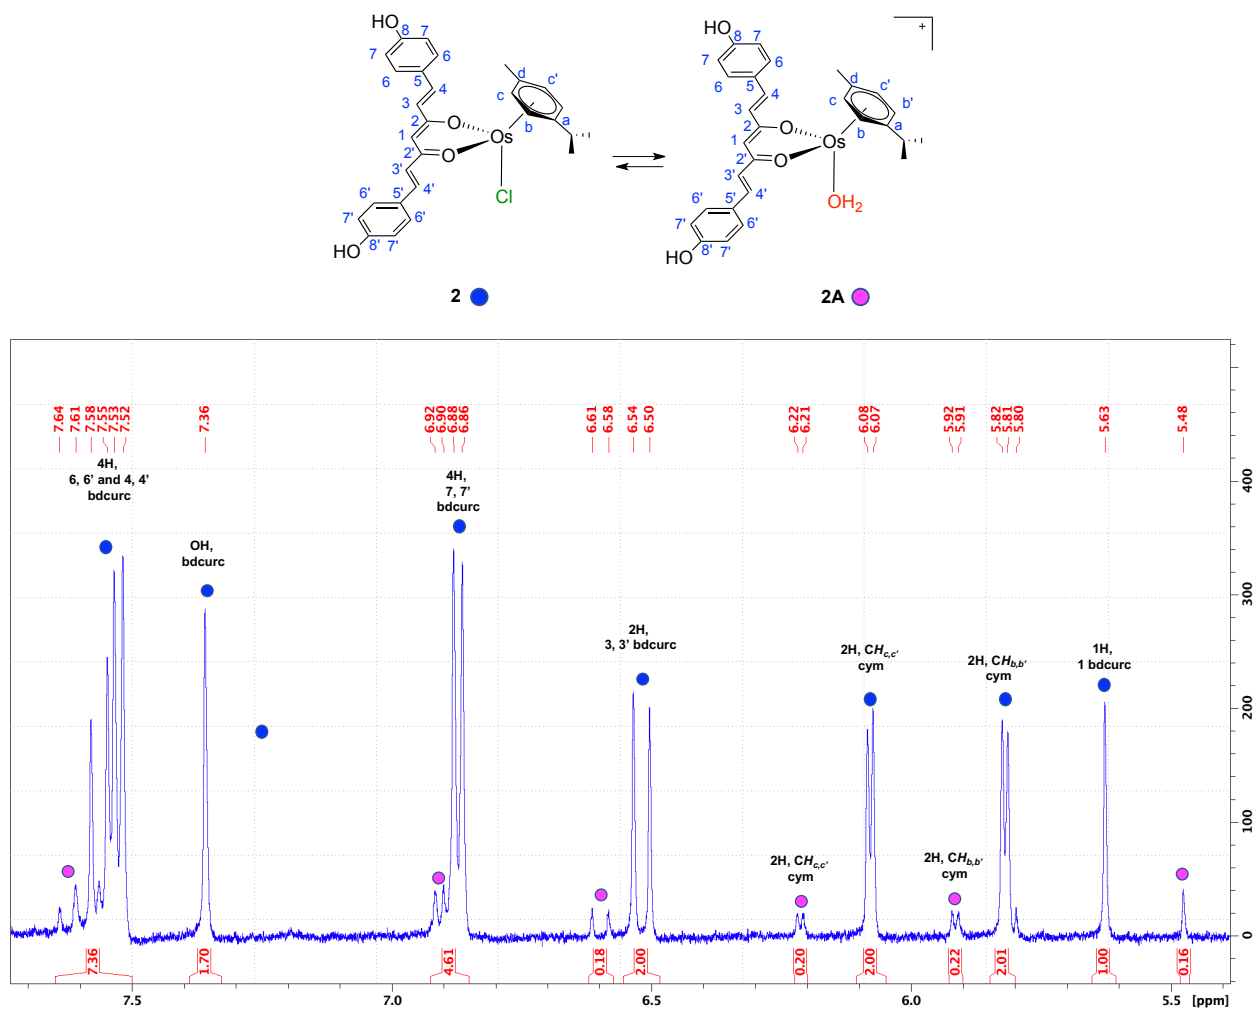

**Figure S27.** Magnification of  $^1\text{H}$  NMR spectrum in  $\text{CD}_3\text{CN}$  at 298 K of **2**.



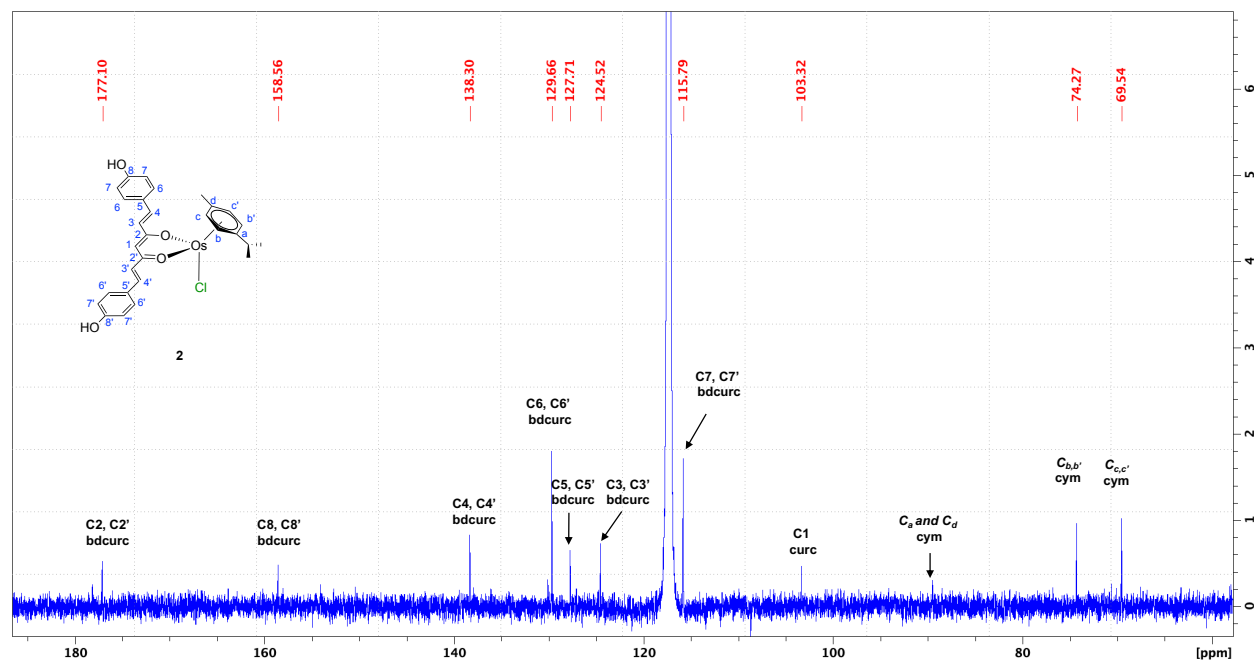

**Figure S28.** Magnification of  $^{13}\text{C}$  NMR spectrum in  $\text{CD}_3\text{CN}$  at 298 K of **2**.

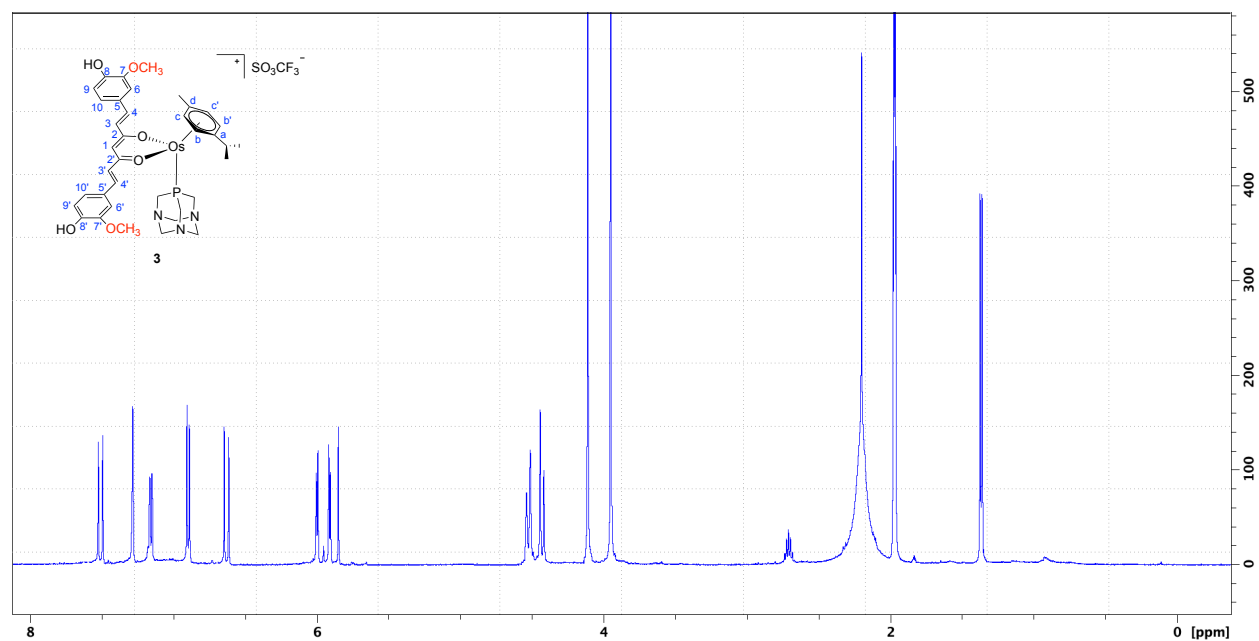

**Figure S29.**  $^1\text{H}$  NMR spectrum in  $\text{CD}_3\text{CN}$  at 298 K of **3**.

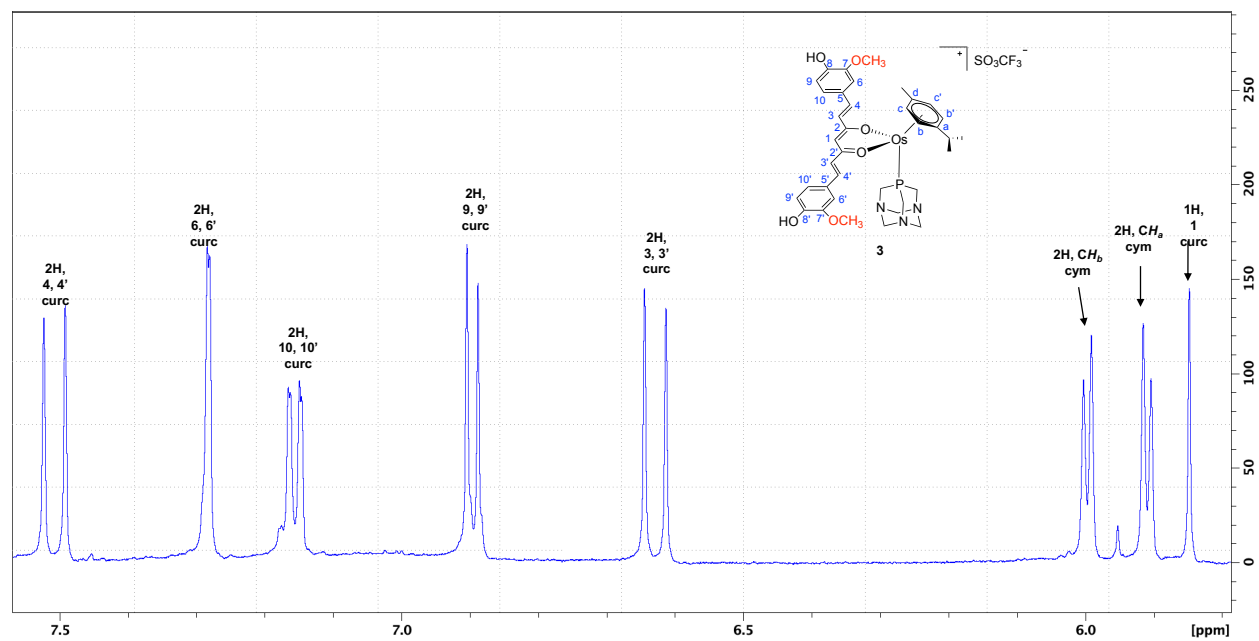

**Figure S30.** Magnification of  $^1\text{H}$  NMR spectrum in  $\text{CD}_3\text{CN}$  at 298 K of **3**.

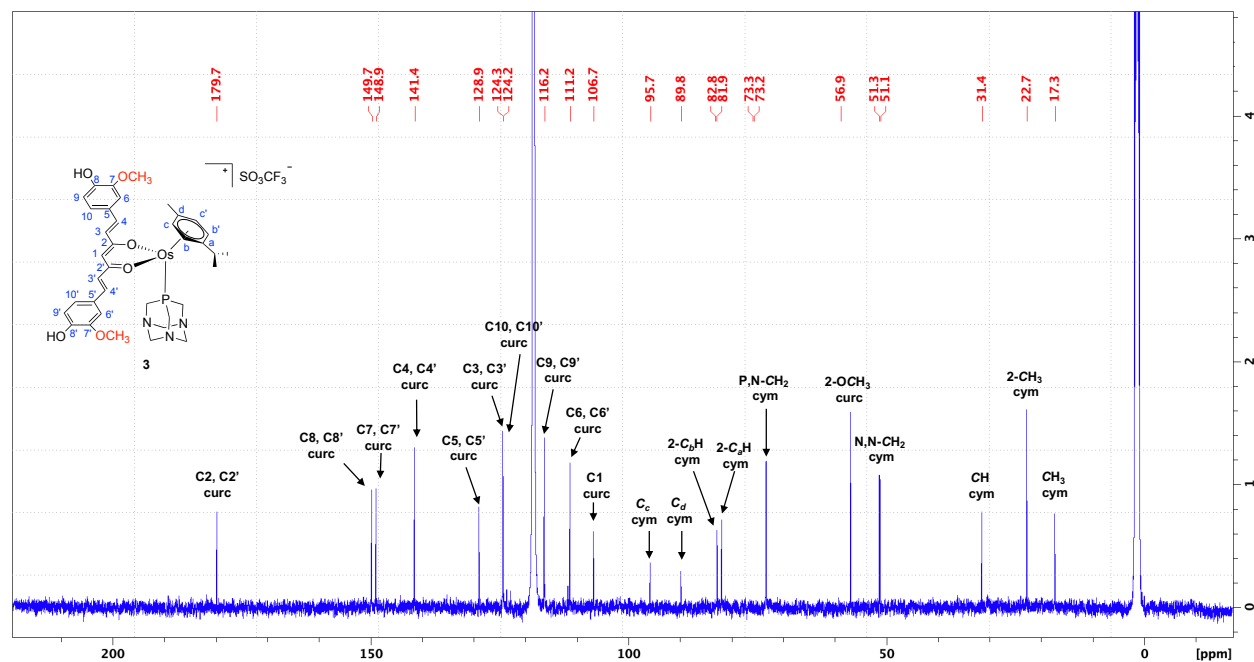

**Figure S31.**  $^{13}\text{C}$  NMR spectrum in  $\text{CD}_3\text{CN}$  at 298 K of **3**.

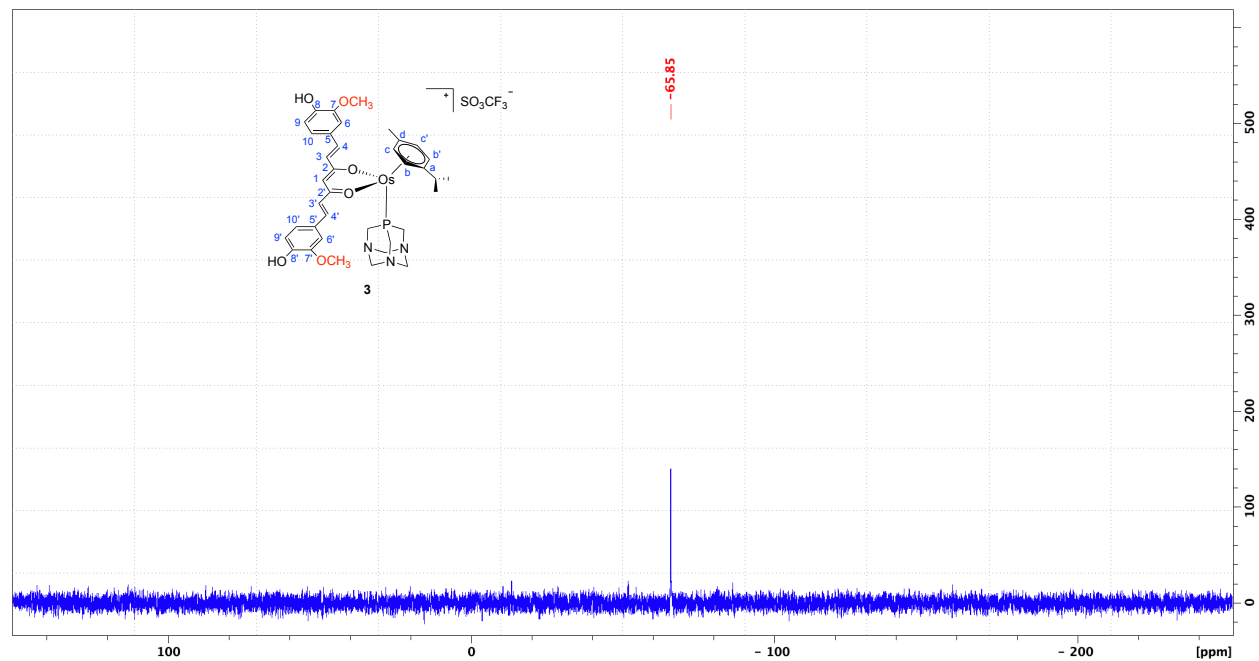

**Figure S32.**  $^{31}\text{P}$  NMR spectrum in  $\text{CD}_3\text{CN}$  at 298 K of **3**.

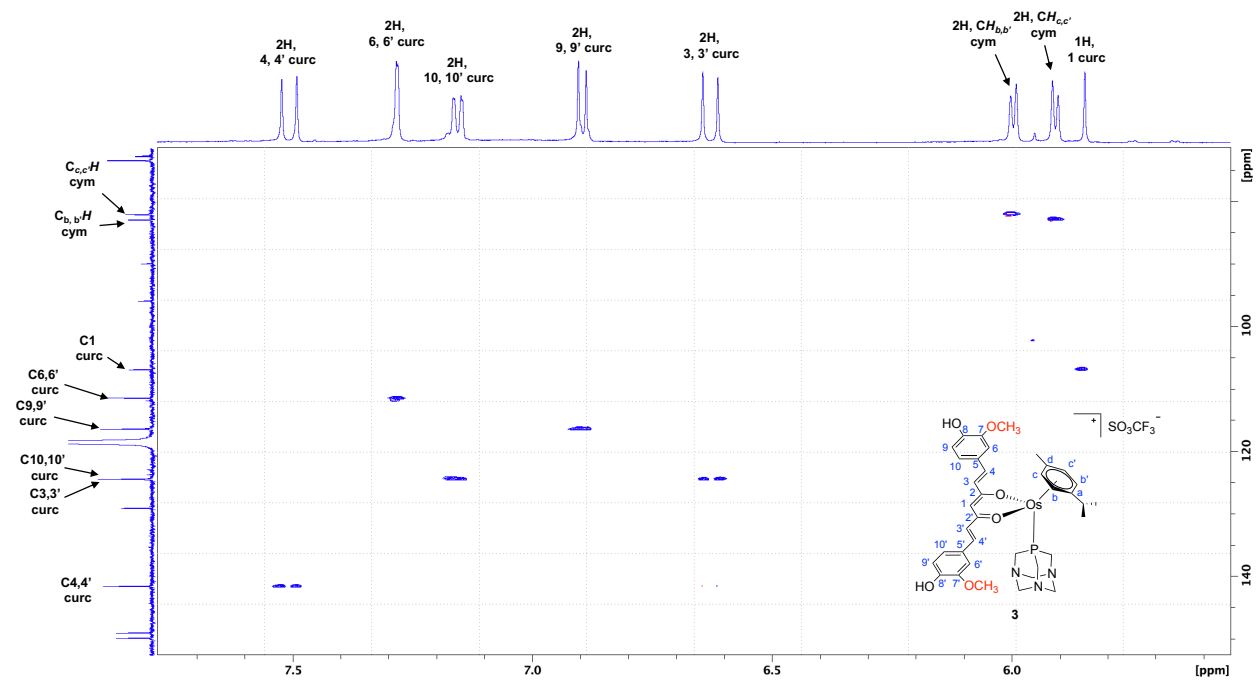

**Figure S33.** Magnification of  $\{^1\text{H}, ^{13}\text{C}\}$ -HSQC spectrum in  $\text{CD}_3\text{CN}$  at 298 K of **3**.

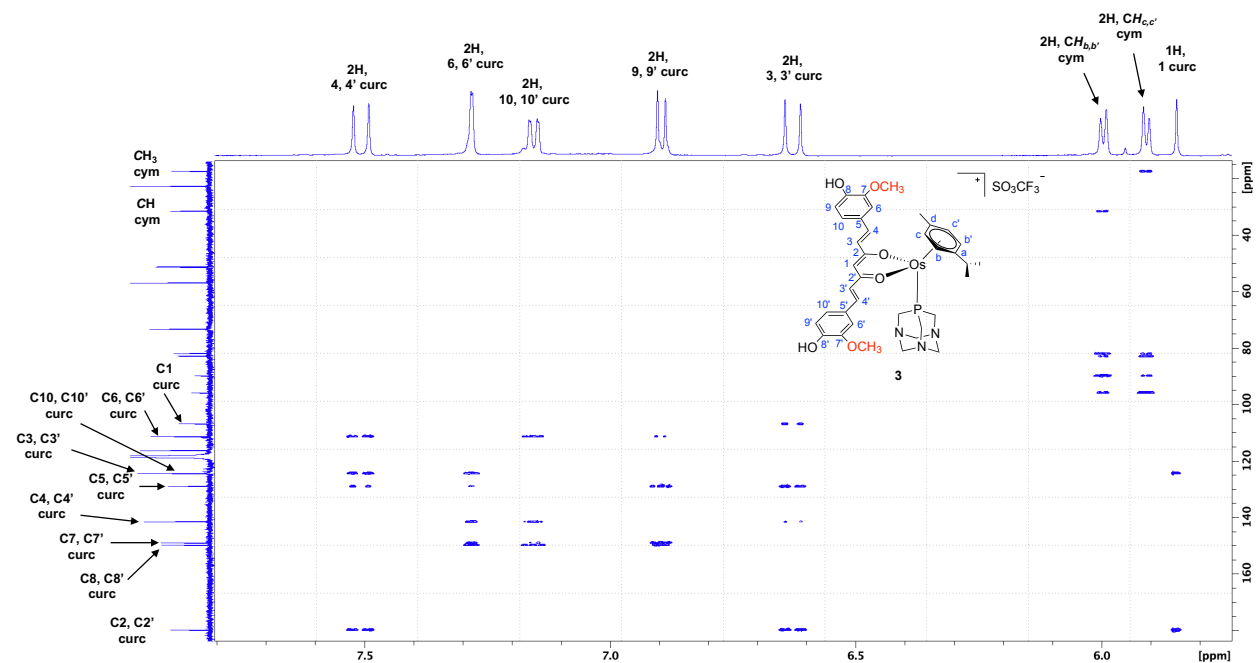

**Figure S34.** Magnification of  $\{^1\text{H}, ^{13}\text{C}\}$ -HMBC spectrum in  $\text{CD}_3\text{CN}$  at 298 K of **3**.

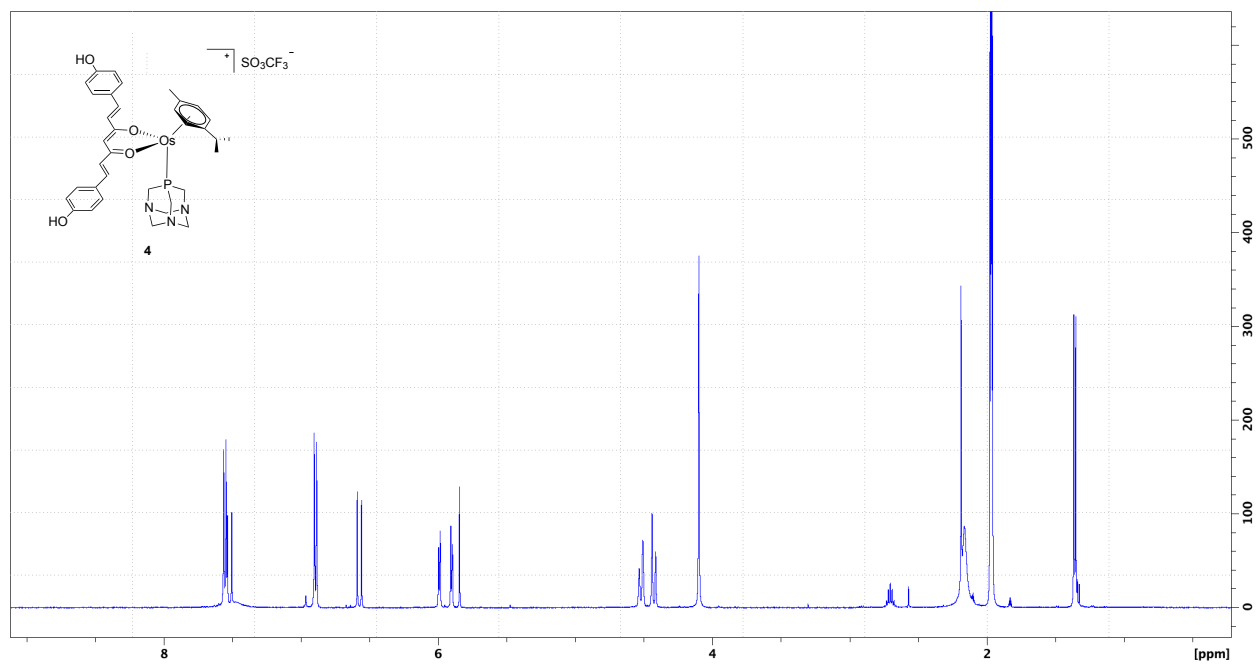

**Figure S35.**  $^1\text{H}$  NMR spectrum in  $\text{CD}_3\text{CN}$  at 298 K of **4**.

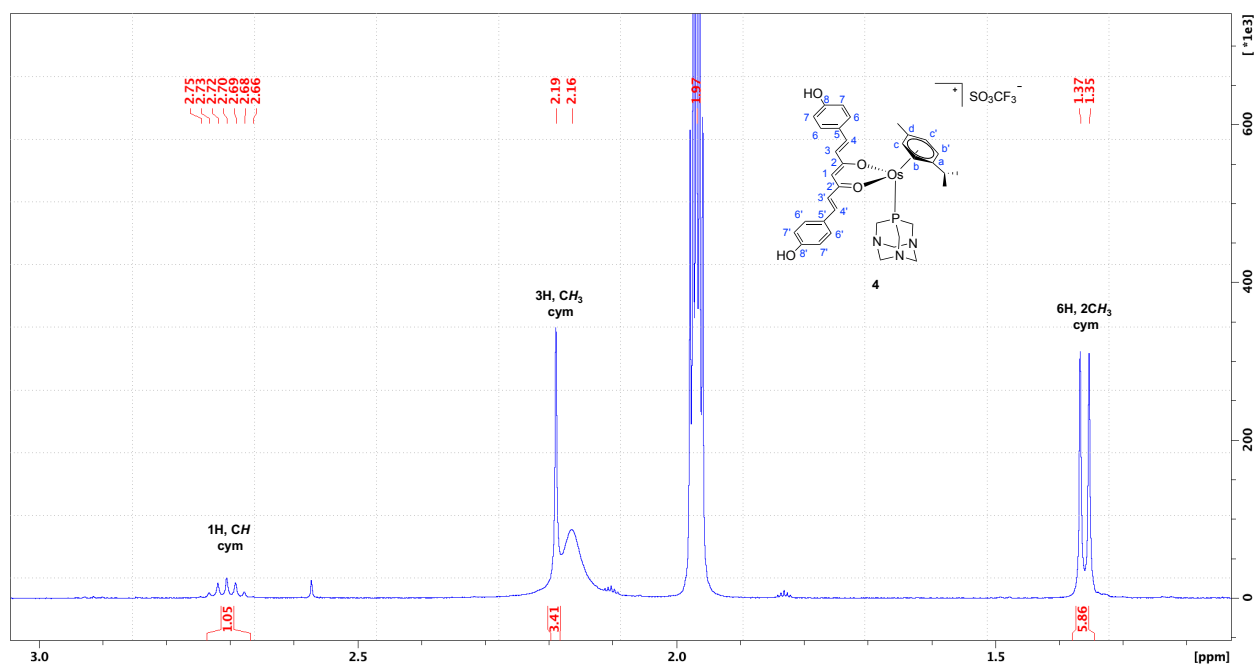

**Figure S36.** Magnification of  $^1\text{H}$  NMR spectrum in  $\text{CD}_3\text{CN}$  at 298 K of **4**.

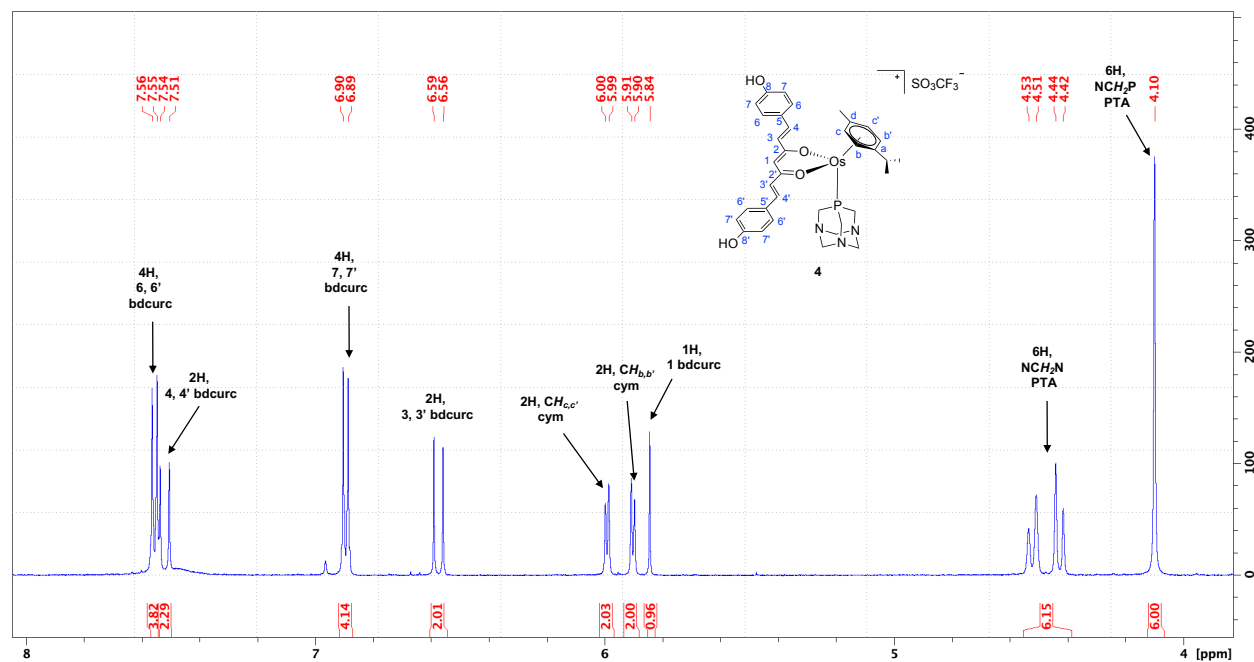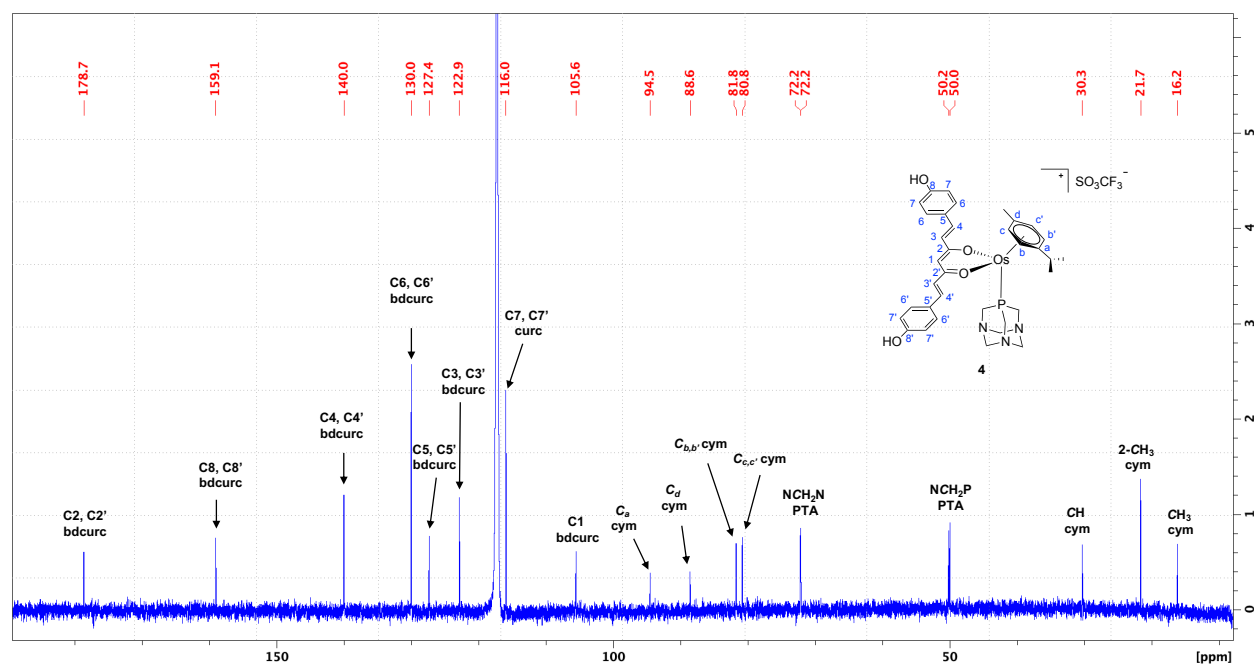

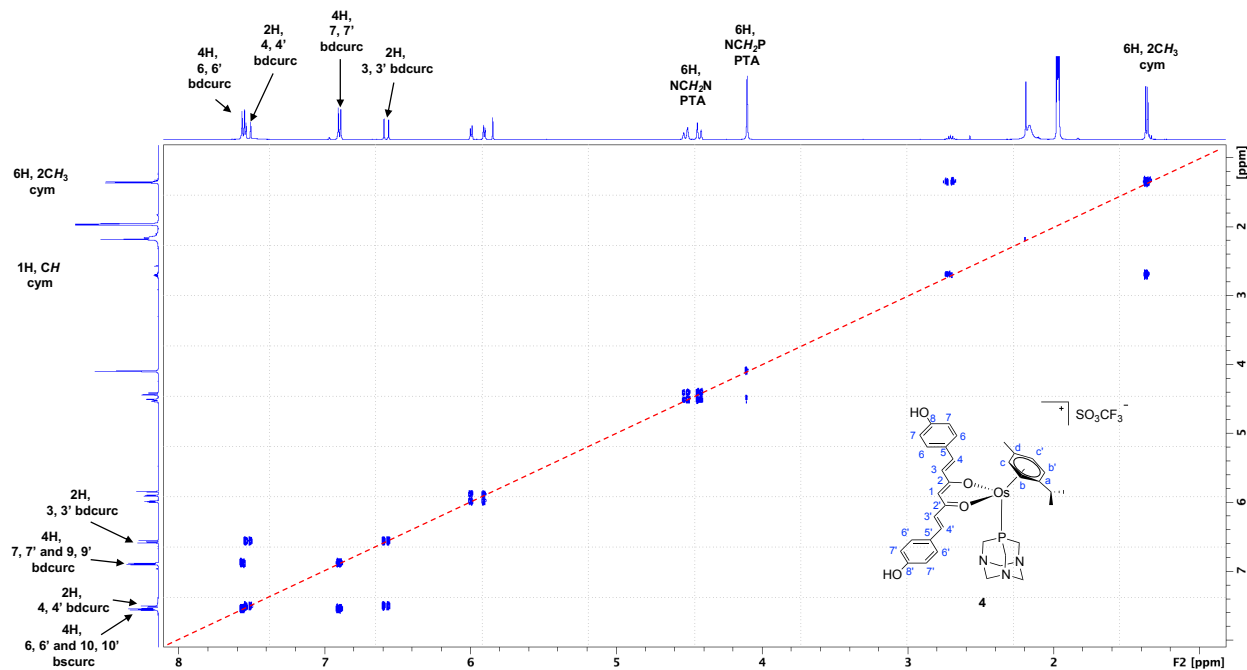

**Figure S39.**  $\{^1\text{H}, ^1\text{H}\}$ -COSY spectrum in  $\text{CDCl}_3$  at 298 K of **4**.

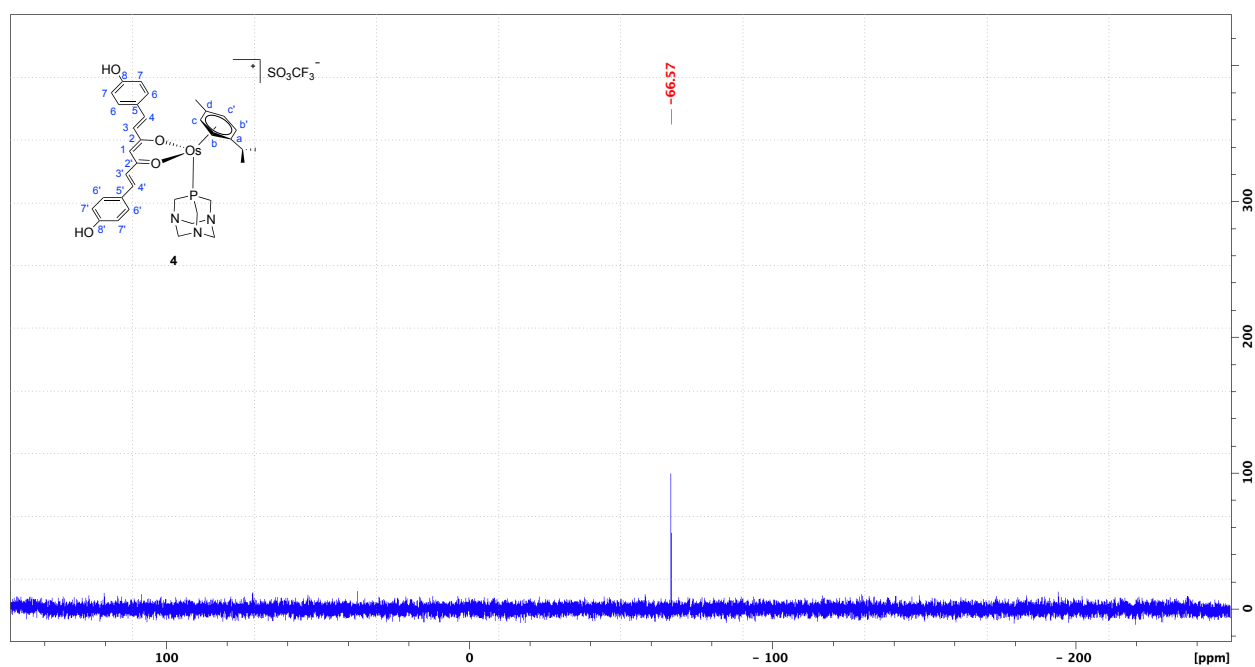

**Figure S40.**  $^{31}\text{P}$  NMR spectrum in  $\text{CD}_3\text{CN}$  at 298 K of **4**.

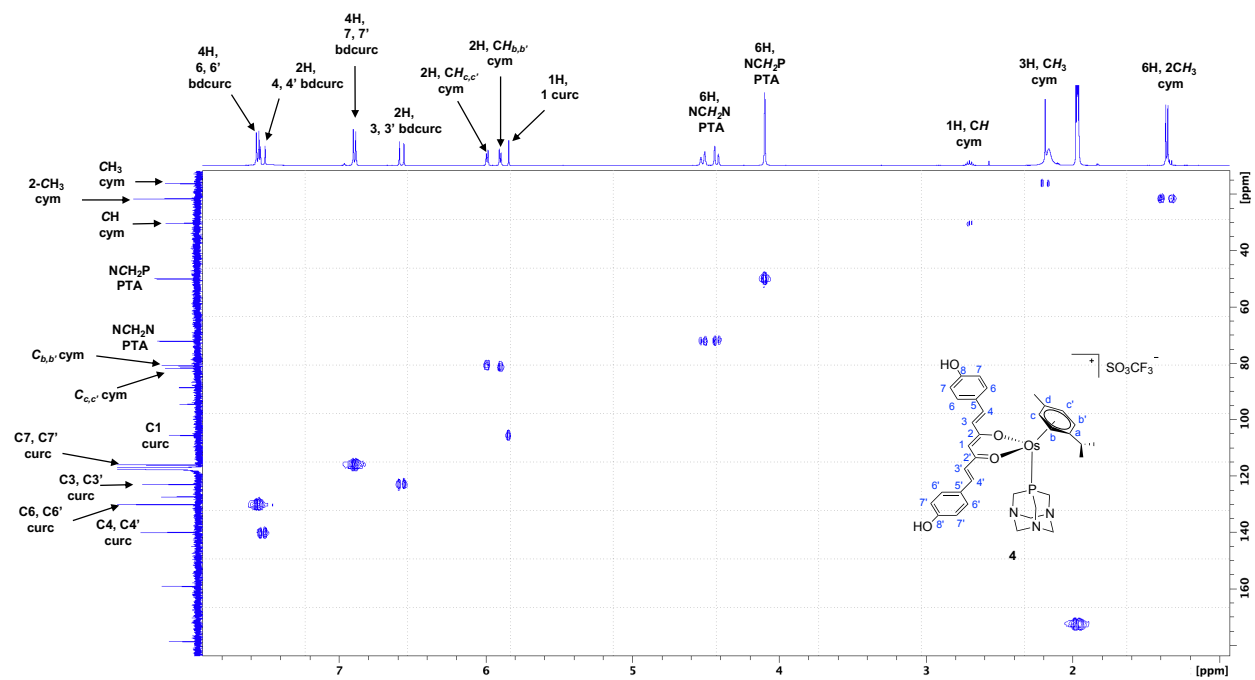

**Figure S41.**  $\{^1\text{H}, ^{13}\text{C}\}$ -HSQC spectrum in  $\text{CD}_3\text{CN}$  at 298 K of **4**.

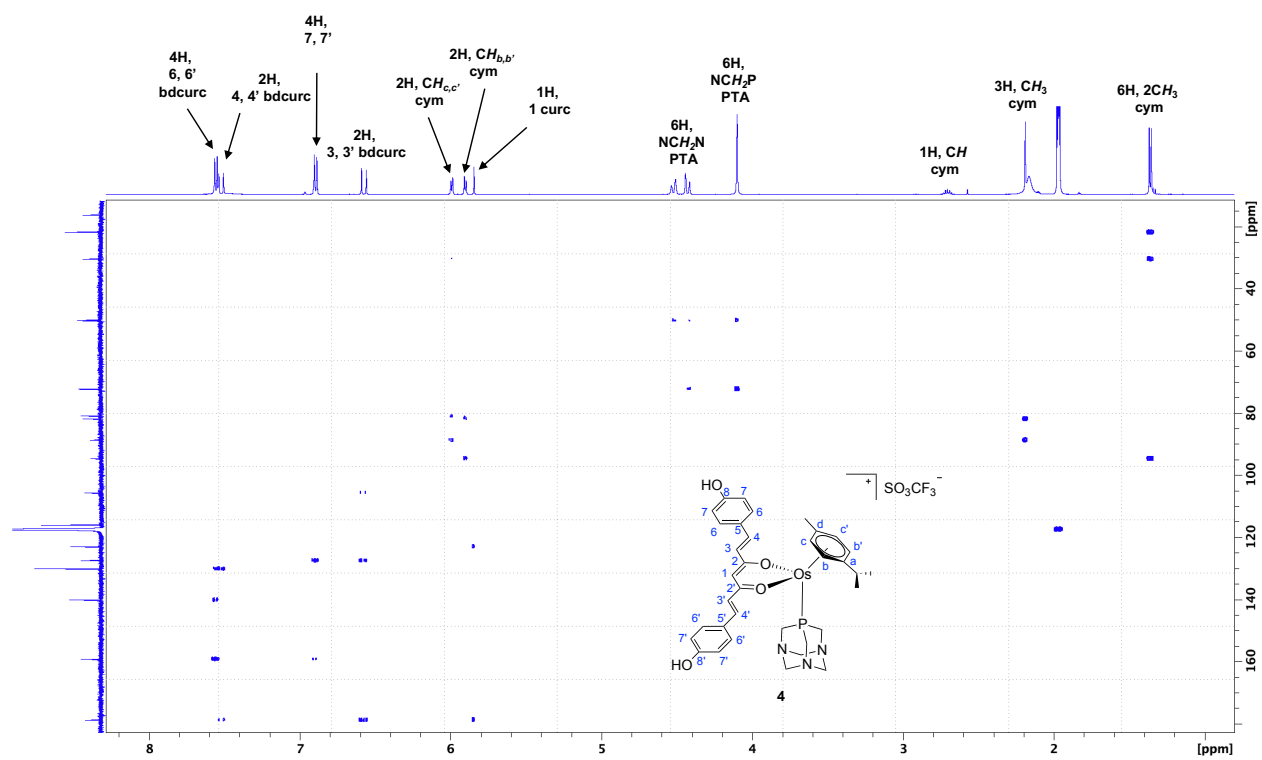

**Figure S42.**  $\{^1\text{H}, ^{13}\text{C}\}$ -HMBC spectrum in  $\text{CD}_3\text{CN}$  at 298 K of **4**.



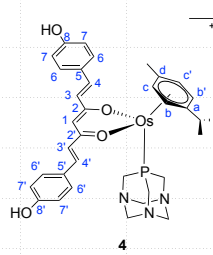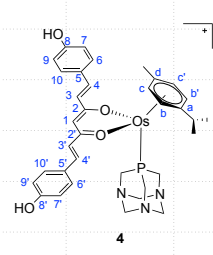

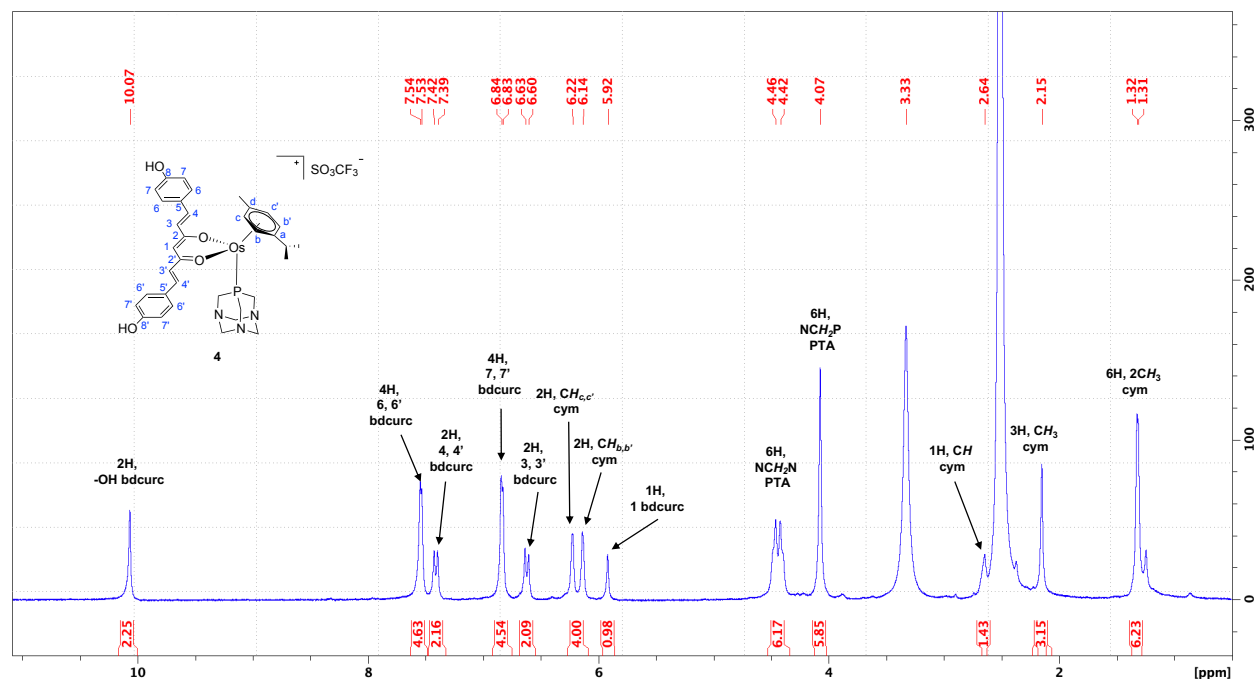

**Figure S45.**  $^1\text{H}$  NMR spectrum in  $[\text{D}_6]\text{DMSO}$  at 298 K of **4**.

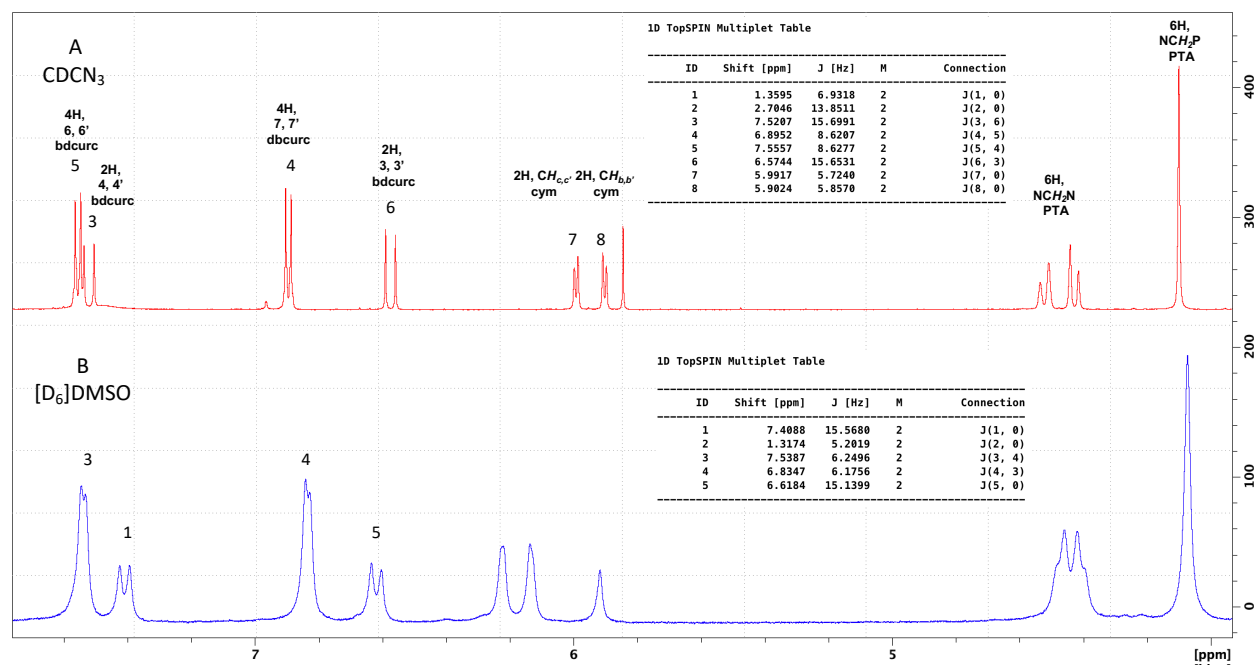

**Figure S46.** Low field region of the  $^1\text{H}$  NMR spectra of **4**,  $[(p\text{-cym})\text{Os}(\text{bdcurec})\text{PTA}]$ : (A) a solution of **4** in  $\text{CD}_3\text{CN}$  at 298 K, (B) a solution of **4**, in  $[\text{D}_6]\text{DMSO}$  at 298 K and.

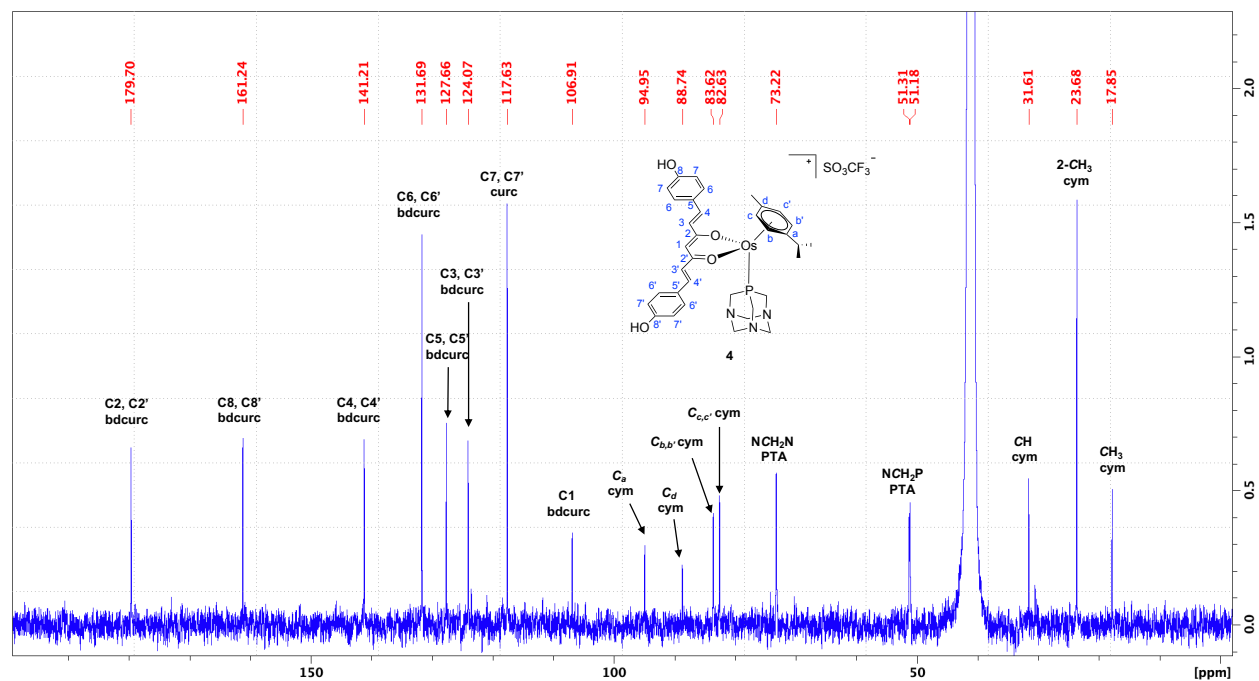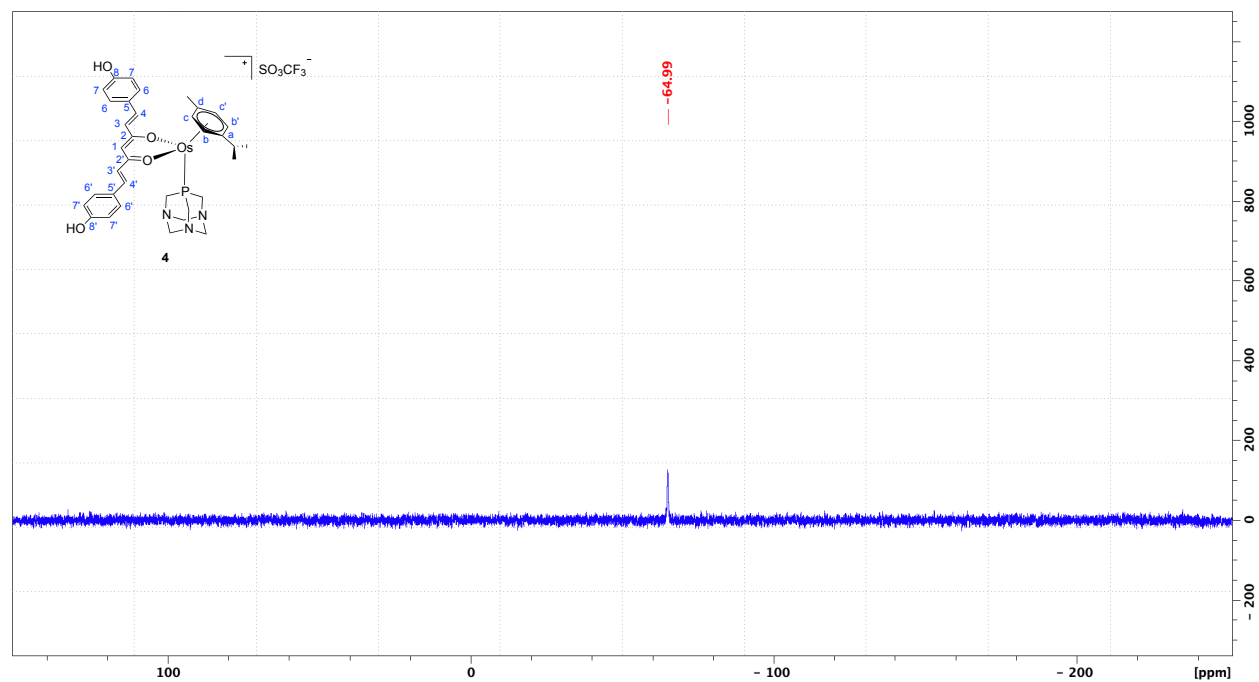

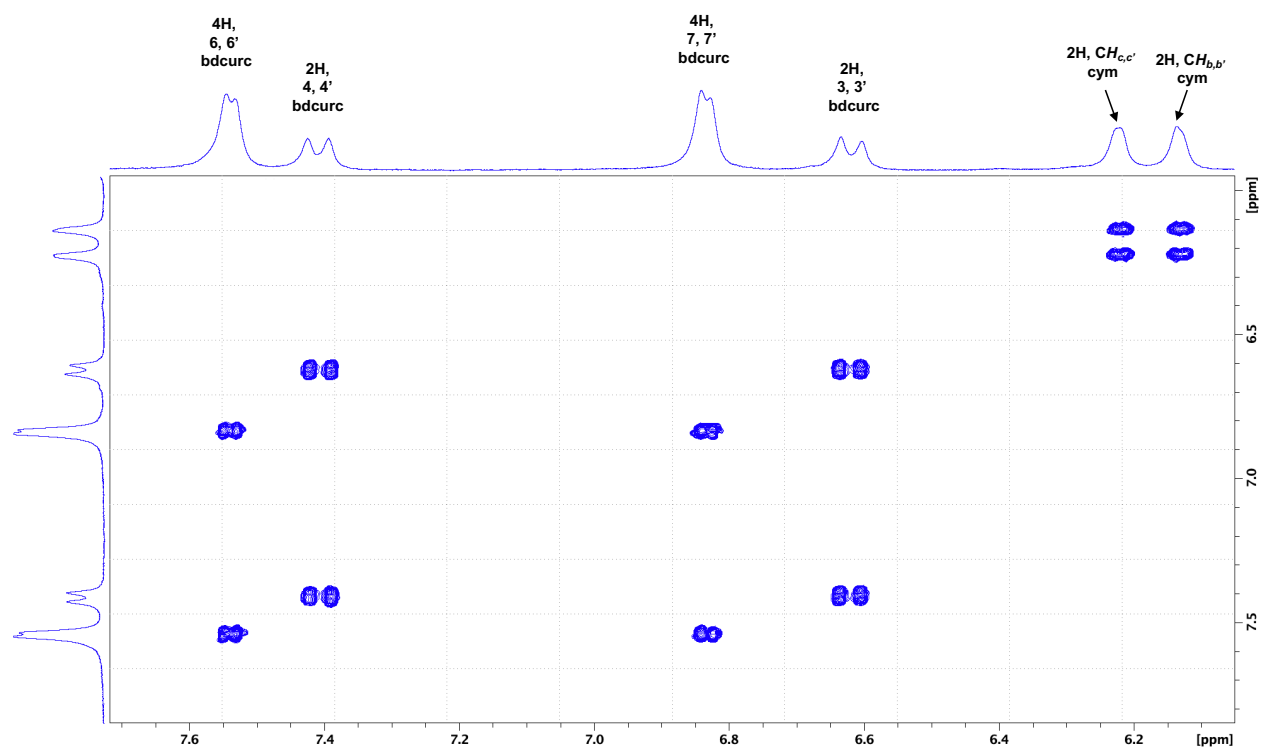

**Figure S49.** Magnification of  $\{^1\text{H}, ^1\text{H}\}$ -COSY spectrum  $[\text{D}_6]$  DMSO at 298 K of **4**.

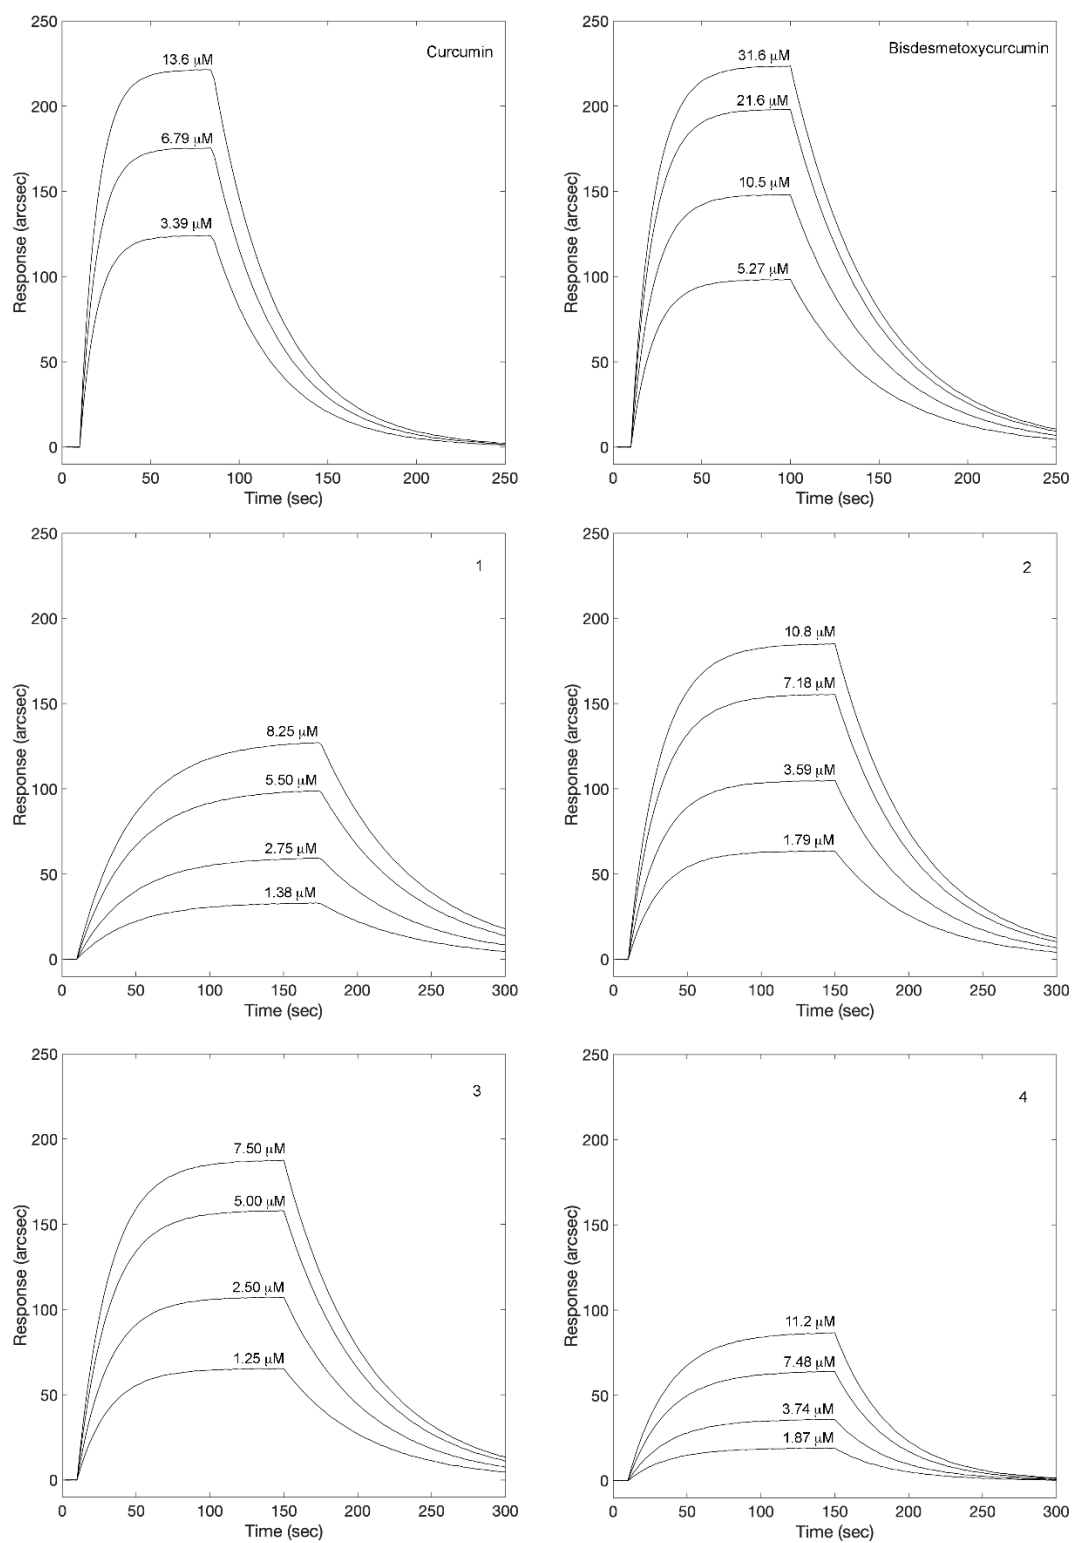

**Fig. S50.** Superimpositions of mono-exponential binding curves obtained upon independent additions of different concentrations of curcH, bdcurch and compounds **1-4** to surface-blocked DNA.

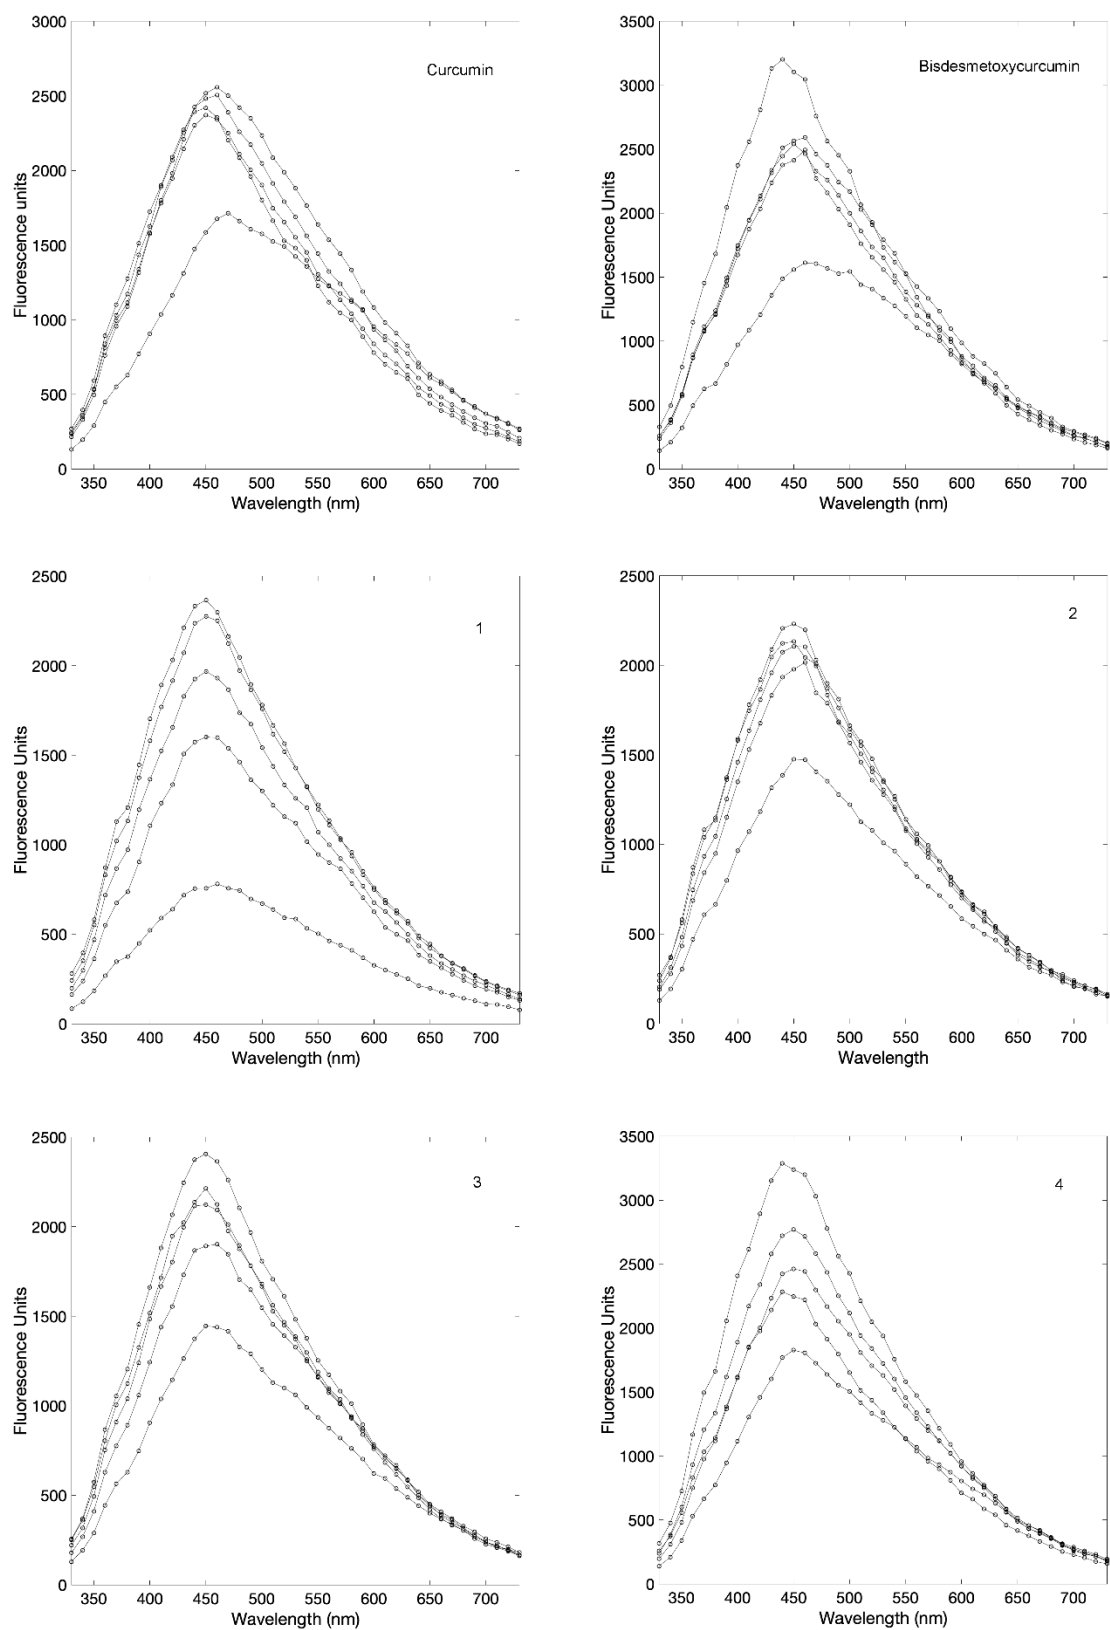

**Fig. S51.** Changes in fluorescence emission spectra of DAPI-DNA complex solution upon excitation at 338 nm (upper curves) in the presence of increasing concentration of curcH, bdcurch and compounds **1-4** the range 0-100  $\mu$ M.

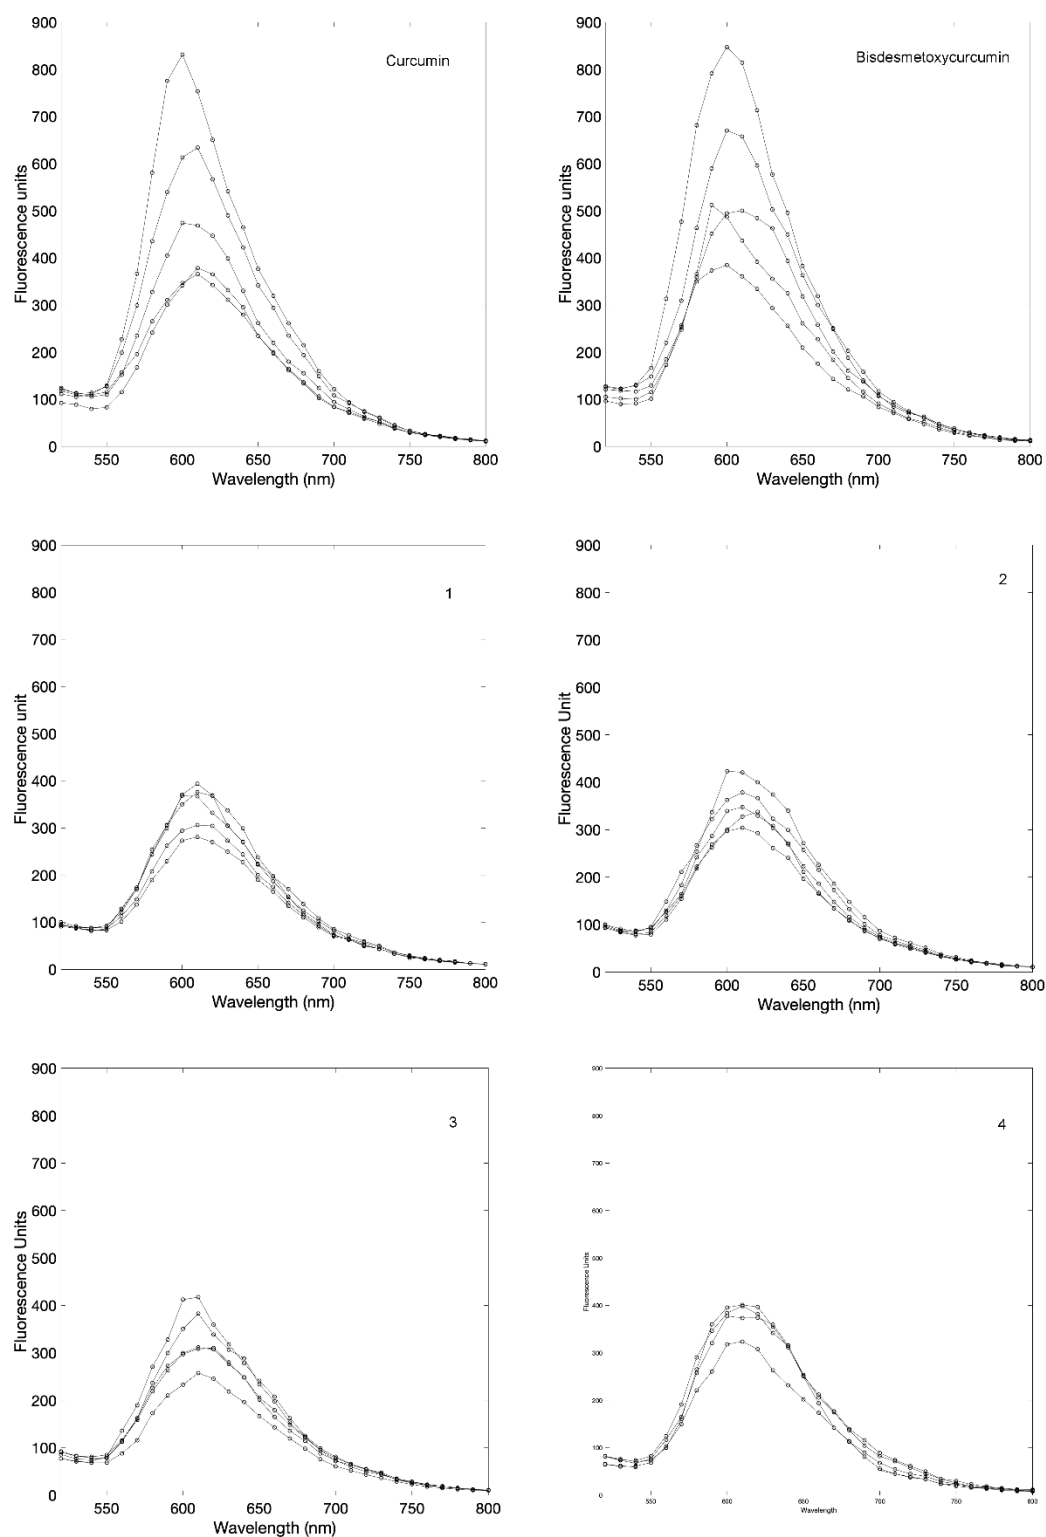

**Fig. S52.** Changes in fluorescence emission spectra of EtBr-DNA complex solution upon excitation at 500 nm (upper curves) in the presence of increasing concentration of curcH, bdcurch and compounds **1-4** the range 0-100  $\mu$ M. Only curcH and bdcurch can displace EtBr molecule and intercalate DNA. No significant change is observed with compounds **1-4**.

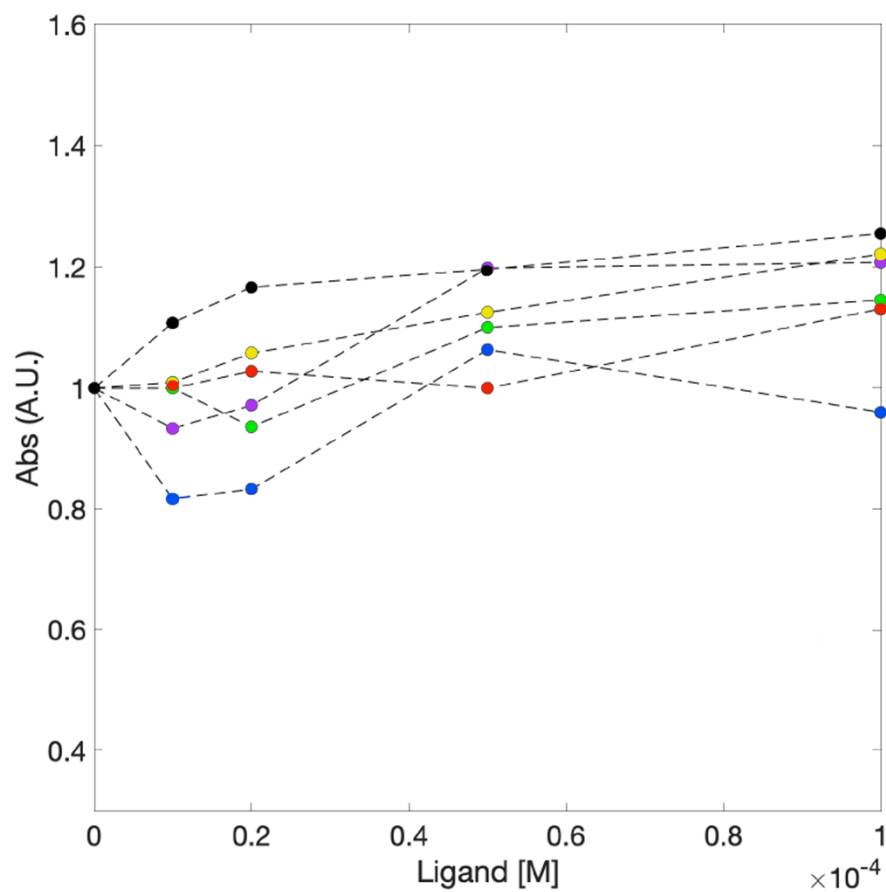

**Fig. S53.** Changes in absorbance at 630 nm of methyl green-DNA complex solution upon competition with increasing concentration of curcH (black), bdcurch (blue) and compounds **1** (green), **2** (yellow), **3** (violet) and **4** (red) in the range 0-100  $\mu$ M.



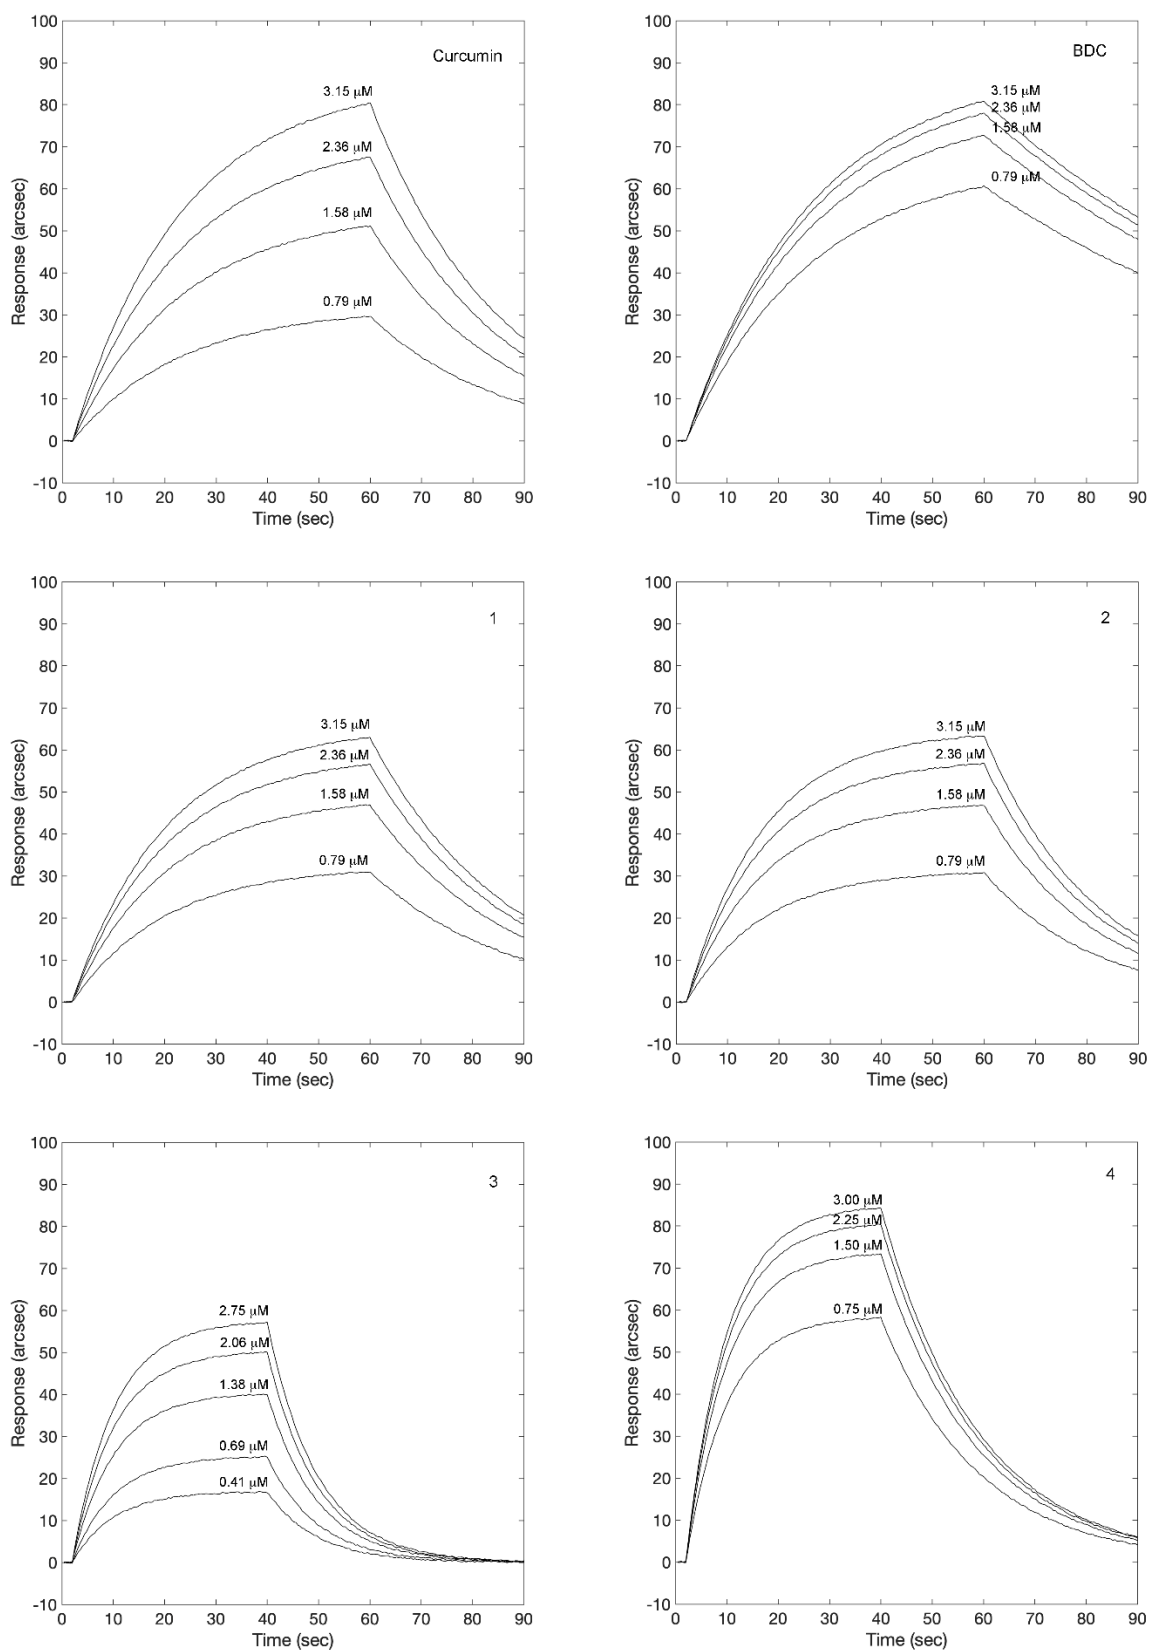

**Fig. S54.** Superimpositions of mono-exponential binding curves obtained upon independent additions of different concentrations of curcH, bdcurch and compounds **1-4** to surface-blocked BSA.

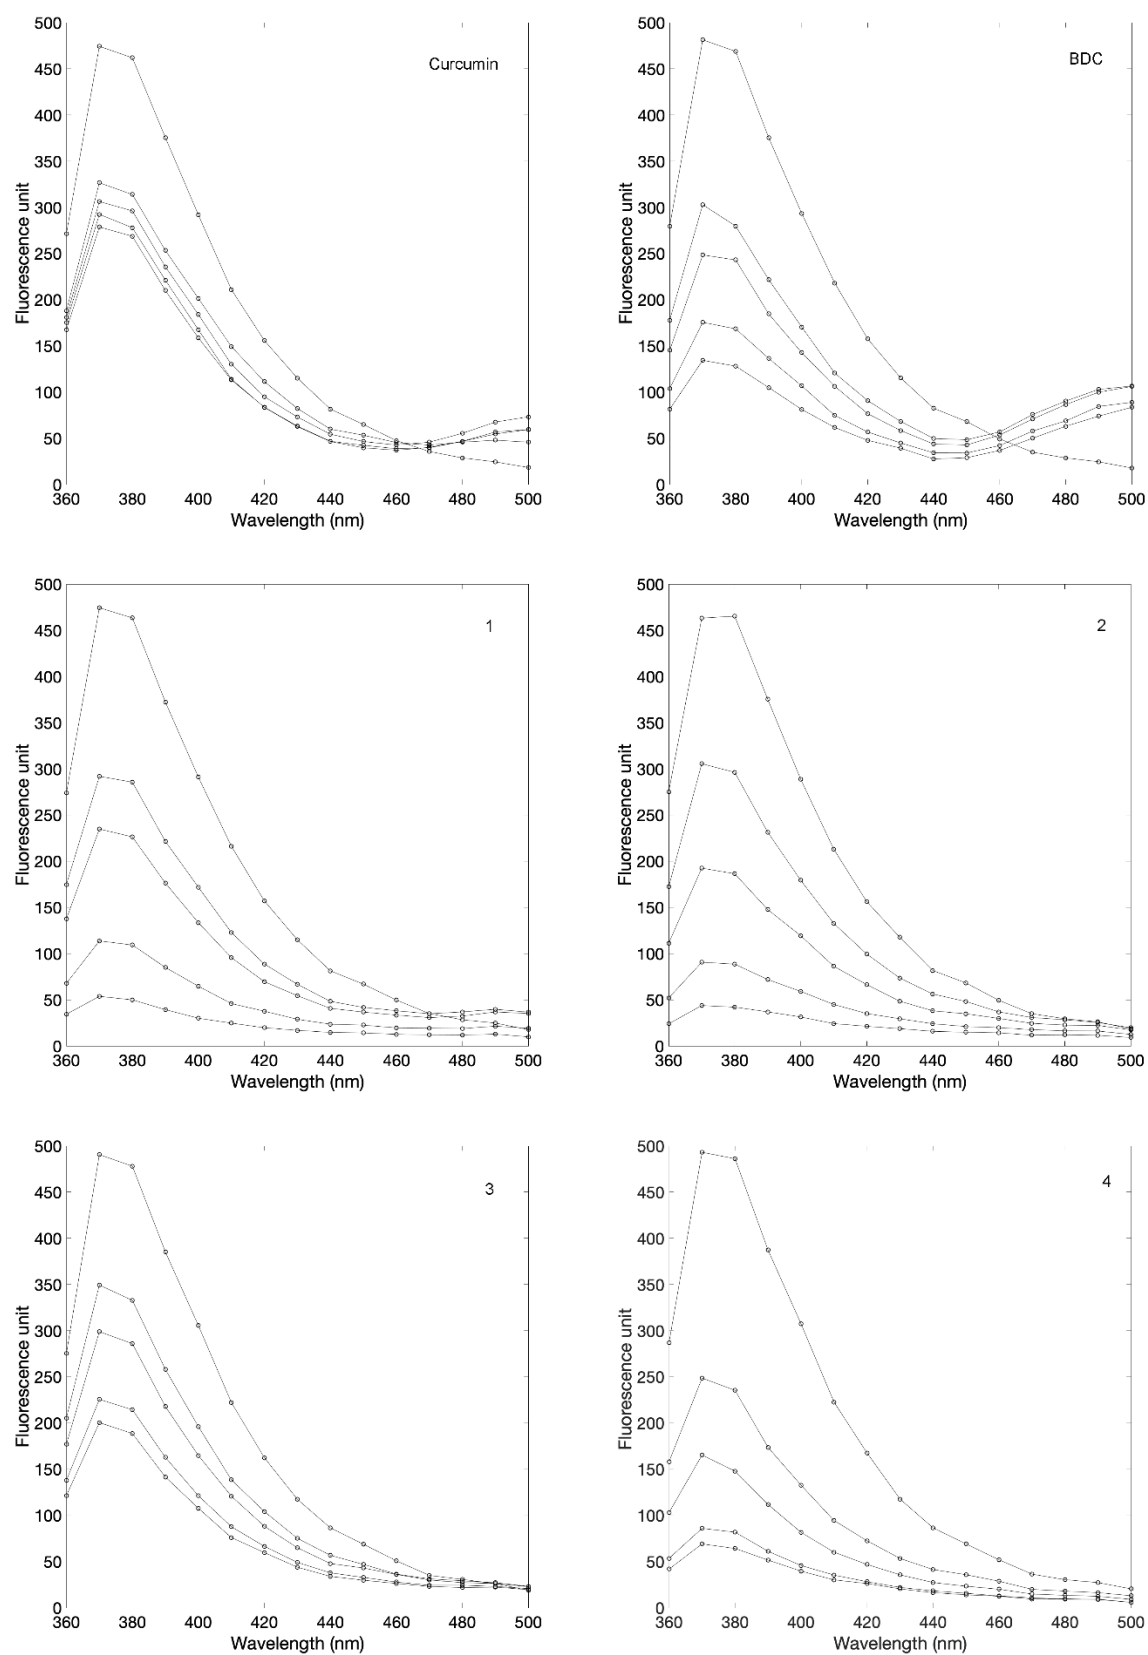

**Fig. S55.** Changes in fluorescence emission spectra of BSA (upper curves) upon titration with curcH, bdcurch, and **1-4** the range 0-100  $\mu$ M.

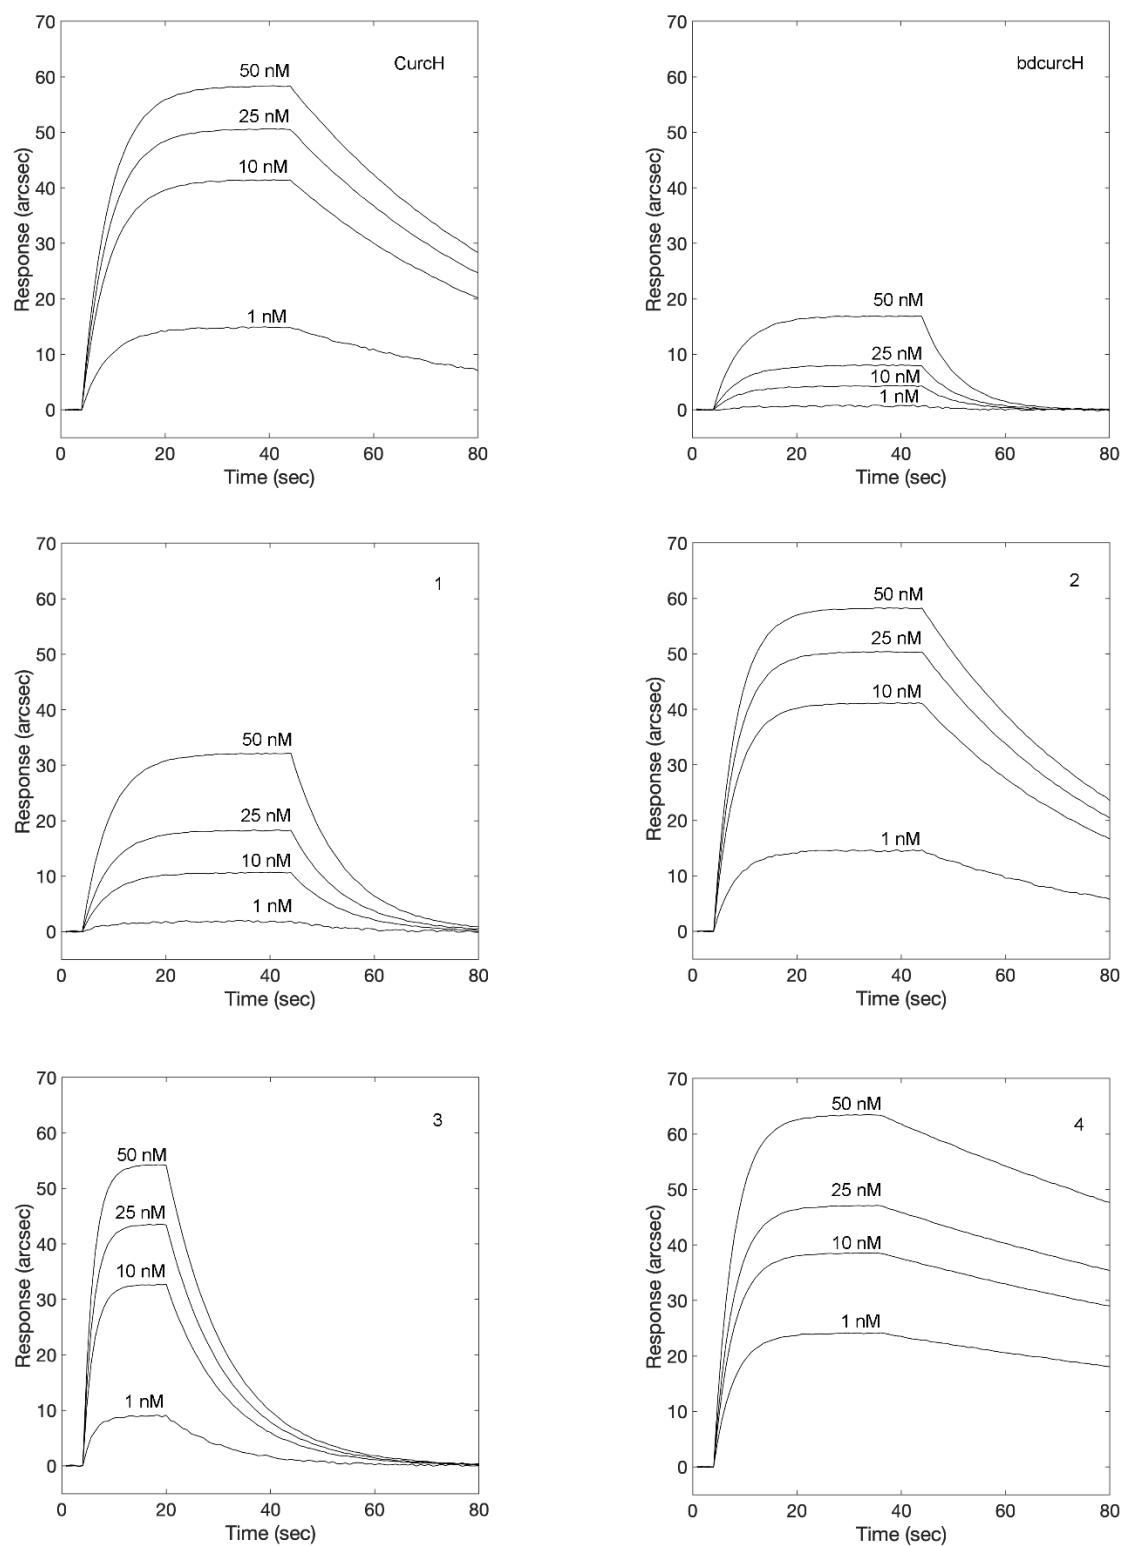

**Fig. S56.** Superimpositions of mono-exponential binding curves obtained upon independent additions of different concentrations of curcH, bdcurch and compounds **1-4** to surface blocked HMGR.
